# Supplementary material for: Rationale and Design of the Genetic Contribution to Drug Induced Renal Injury (DIRECT) Study
Source: PubMed Central journal article supplement — Kidney Int Rep. 2016 Aug 24;1(4):288–98. doi: 10.1016/j.ekir.2016.08.010 (PMC5678673; doi:10.1016/j.ekir.2016.08.010), 2016-08-24
Supplement: mmc1.pdf [file mmc1.pdf]

DR1 - CRF 01

Patient ID:

|  |  |  |  |  |  |
|--|--|--|--|--|--|
|  |  |  |  |  |  |
|--|--|--|--|--|--|

Coordinator ID:

|  |  |  |  |  |  |
|--|--|--|--|--|--|
|  |  |  |  |  |  |
|--|--|--|--|--|--|

Form ID:

|  |  |  |  |  |  |   |  |  |  |  |  |  |
|--|--|--|--|--|--|---|--|--|--|--|--|--|
|  |  |  |  |  |  | - |  |  |  |  |  |  |
|--|--|--|--|--|--|---|--|--|--|--|--|--|

1. Date of Screening: 

|  |  |
|--|--|
|  |  |
|--|--|

 / 

|  |  |
|--|--|
|  |  |
|--|--|

 / 

|  |  |  |  |
|--|--|--|--|
|  |  |  |  |
|--|--|--|--|

 (mm/dd/yyyy)2. Patient location during the index event of this study:  Inpatient  Outpatient**Demographics**

Please enter patient data as recorded at hospital admission (for inpatient) or clinic visit (for outpatient) around which the index event occurred. Ethnic and racial data are self-reporting by the patient based on modified NIH categorization as follows:

- American Indian or Alaska Native: A person having origins in any of the original peoples of North, Central, or South America, and who maintains tribal affiliations or community attachment.
- Asian: A person having origins in any of the original peoples of the Far East, Southeast Asia, or the Indian subcontinent.
- Black or African American: A person having origins in any of the black racial groups of Africa.
- Native Hawaiian or Other Pacific Islander: A person having origins in any of the original peoples of Hawaii, Guam, Samoa, or other Pacific Islands.
- White: A person having origins in any of the original peoples of Europe, the Middle East, or North Africa.
- Hispanic or Latino: In this study "Hispanic or Latino" refers to the ethnic population with origins in the countries of Latin America.

3. Gender:  Male  Female4. Age: 

|  |  |
|--|--|
|  |  |
|--|--|

5. Weight: 

|  |  |  |
|--|--|--|
|  |  |  |
|--|--|--|

 . 

|  |
|--|
|  |
|--|

 kg  NA6. Height: 

|  |  |  |
|--|--|--|
|  |  |  |
|--|--|--|

 . 

|  |
|--|
|  |
|--|

 inch  cm  NA

7. Race:
- American Indian or Alaska Native
  - Asian
  - Black
  - Native Hawaiian or Other Pacific Islander
  - White
  - Hispanic or Latino
  - Not Reported
  - Other (please specify) :

|  |
|--|
|  |
|--|

**DIRI Phenotypes and Candidate Drugs****8. Select the DIRI phenotype to investigate on this patient:**

(Note: Glomerular disorder phenotype requires kidney biopsy findings to be eligible for study.)

- AKI (Nephrotoxic, Allergic, Mixed)
- Glomerular Disorder (Hematuria, Heavy Proteinuria, GN)

Patient ID:

|  |  |  |  |  |  |
|--|--|--|--|--|--|
|  |  |  |  |  |  |
|--|--|--|--|--|--|

Form ID:

|  |  |  |  |  |  |   |  |  |  |  |
|--|--|--|--|--|--|---|--|--|--|--|
|  |  |  |  |  |  | - |  |  |  |  |
|--|--|--|--|--|--|---|--|--|--|--|

DIRI - CRF 01

**9. Review candidate drugs included for study for respective DIRI phenotypes:**

**Candidate Drugs for AKI Phenotype**

|                   |                    |                    |                                       |
|-------------------|--------------------|--------------------|---------------------------------------|
| A01-Abacavir      | C04-Ciprofloxacin  | I05-Imipenem       | P02-Pantoprazole                      |
| A02-Acyclovir     | C05-Cisplatin      | I04-Indomethacin   | P03-Penicillin                        |
| A08-Allopurinol   | C15-Citalopram     | I06-Ipilimumab     | P07-Phenytoin                         |
| A03-Amikacin      | C12-Clindamycin    | I07-Irbesartan     | P04-Piperacillin/<br>tazobactam       |
| A04-Amoxicillin   | C06-Colistin       | K02-Ketoprofen     | P06-Polymyxin                         |
| A05-Amphotericin  | C07-Cylosporine    | K01-Ketorolac      | R01-Rifampin                          |
| A06-Ampicillin    | D02-Daptomycin     | L02-Lansoprazole   | S04-Streptomycin                      |
| A07-Atazanavir    | D03-Diclofenac     | L03-Levofloxacin   | S02-Sulfadiazine                      |
| C11-Carbamazepine | D01-Didanosine     | M01-Meropenem      | S01-Sulfamethoxazole/<br>trimethoprim |
| C09-Carboplatin   | D04-Doxycycline    | M02-Mesalamine     | S03-Sulfasalazine                     |
| C10-Cefalexin     | E01-Esomeprazole   | M04-Metformin      | T01-Tacrolimus                        |
| C01-Cefazolin     | E02-Etanercept     | M03-Methotrexate   | T05-Teicoplanin                       |
| C13-Cefepime      | F03-Flucloxacillin | N01-Nafcillin      | T02-Tenofovir                         |
| C08-Ceftaroline   | F01-Foscarnet      | N02-Naproxen       | T03-Tobramycin                        |
| C02-Ceftazidime   | G02-Gemcitabine    | N03-Nitrofurantoin | T04-Torsemide                         |
| C14-Ceftriaxone   | G01-Gentamicin     | O03-Olmesartan     | V01-Vancomycin                        |
| C16-Celecoxib     | I01-Ibuprofen      | O01-Omeprazole     |                                       |
| C03-Cidofovir     | I02-Ifosfamide     | O02-Oxacillin      |                                       |

**Candidate Drugs for Glomerular Disorder Phenotype**

|                  |                  |                  |                                 |
|------------------|------------------|------------------|---------------------------------|
| A04-Amoxicillin  | G02-Gemcitabine  | N01-Nafcillin    | P04-Piperacillin/<br>tazobactam |
| A06-Ampicillin   | H01-Hydralazine  | N02-Naproxen     | P05-Propylthiouracil            |
| B01-Bevacuzimub  | I01-Ibuprofen    | O01-Omeprazole   | R01-Rifampin                    |
| C03-Cidofovir    | I02-Ifosfamide   | O02-Oxacillin    | R02-Ritonavir                   |
| C07-Cylosporine  | I04-Indomethacin | P01-Pamidronate  | T01-Tacrolimus                  |
| E01-Esomeprazole | K01-Ketorolac    | P02-Pantoprazole |                                 |
| E03-Exenatide    | L02-Lansoprazole | P03-Penicillin   |                                 |

10. Does the candidate drug list (item 9) for the selected phenotype (item 8) include at least one of the drugs you wish to investigate on this patient? (Please note that a drug can only be considered for study if the patient was exposed to this drug for at least 24 hours.)

Yes  No

If No, stop screening for this patient.

11. If Yes, please select up to three drugs from the list you wish to investigate and enter their drug IDs and trade names in order of preference: (Drug ID is the three-character string, e.g. V01 for Vancomycin, which prefixes each drug name in the drug lists in item 9.)

|                            | Drug ID              | Trade Name           |
|----------------------------|----------------------|----------------------|
| a. Drug 1 (primary drug):  | <input type="text"/> | <input type="text"/> |
| b. Drug 2 (optional drug): | <input type="text"/> | <input type="text"/> |
| c. Drug 3 (optional drug): | <input type="text"/> | <input type="text"/> |

**Chronic Kidney Disease (CKD) Status**

12. Lowest serum creatinine between 90 days to 12 months prior to hospital admission or first clinic visit date:

a. CKD Baseline Creatinine:     .    mg/dL  NA  
 umol/L

b. Date Recorded:   /   /     (mm/dd/yyyy)

13. If CKD baseline creatinine is available, look up in CKD Stage 5 Creatinine Table (Appendix 1 or 2 of this CRF) for the lowest creatinine value at which level this patient would be considered CKD Stage 5 (eGFR < 15 mL/min/1.73 m<sup>2</sup>) and record the value below.

a. CKD Stage 5 Creatinine:     .    mg/dL  
 umol/L

14. Historical evidence of CKD based on standard criteria: proteinuria, biopsy, ultrasound size.

Yes  No

Patient ID:

|  |  |  |  |  |  |
|--|--|--|--|--|--|
|  |  |  |  |  |  |
|--|--|--|--|--|--|

Form ID:

|  |  |  |  |  |  |   |  |  |  |  |
|--|--|--|--|--|--|---|--|--|--|--|
|  |  |  |  |  |  | - |  |  |  |  |
|--|--|--|--|--|--|---|--|--|--|--|

DIRI - CRF 01

**Risk Factors**15. Does patient have high risk for AKI?  Yes  No  Unknown

If yes, please check all applicable risk factors:

- |                                                                        |                                                                            |
|------------------------------------------------------------------------|----------------------------------------------------------------------------|
| <input type="checkbox"/> Age > 75                                      | <input type="checkbox"/> Diabetes                                          |
| <input type="checkbox"/> Severe Infection (Sepsis)                     | If diabetic, answer the following check list:                              |
| <input type="checkbox"/> Chronic Heart Failure                         | <input type="checkbox"/> Requires Medication                               |
| <input type="checkbox"/> Chronic Liver Disease                         | <input type="checkbox"/> Requires Insulin                                  |
| <input type="checkbox"/> Decreased Albumin (< 3 g/dL or 30 g/L)        | <input type="checkbox"/> Hyperglycemia (Glucose > 110 mg/dL or 6.1 mmol/L) |
| <input type="checkbox"/> Anemia (Hb < 9 g/dL)                          | <input type="checkbox"/> Peripheral Vascular Disease                       |
| <input type="checkbox"/> Radiocontrast 72 hours prior to drug exposure | <input type="checkbox"/> Chronic Lung Disease (COPD)                       |
| <input type="checkbox"/> Hypotension (Shock, MAP < 60)                 |                                                                            |

**Inclusion Criteria** (All answers must be "Yes" for patient to be considered for study.)

16.  Yes  No Age ≥ 2 years.
17.  Yes  No Exposure to a DIRI medication to be studied.

**Exclusion Criteria** (All answers must be "No" for patient to be considered for study.)

18.  Yes  No Unable to provide written informed consent.
19.  Yes  No Patient with a history or have a kidney transplant.
20.  Yes  No Patient with bone marrow transplant.
21.  Yes  No Patient with CKD stage 5 (item 12a ≥ item 13a, mark No if creatinine value not available).
22.  Yes  No On more than 3 causal agents.
23.  Yes  No No history on time course for drug exposure.
24.  Yes  No Incomplete data elements.

Stop screening for this patient if patient did not meet all inclusion and exclusion criteria.

**Kidney Biopsy**

25. Was there abnormal result observed in a kidney biopsy performed within four weeks after stopping the drug you wish to investigate? (Please note that kidney biopsy is a prerequisite for glomerular disorder phenotype.)

- Yes  No  No biopsy performed

If Yes, please answer the following questions:

a. Date Biopsy Performed:  /  /  (mm/dd/yyyy)

b. Biopsy Findings: (Check all that apply)

- |                                                       |                                                      |
|-------------------------------------------------------|------------------------------------------------------|
| <input type="checkbox"/> Acute Interstitial Nephritis | <input type="checkbox"/> Acute Tubular Necrosis      |
| <input type="checkbox"/> Glomerulonephritis           | <input type="checkbox"/> Thrombosis with HUS/TTP/HSP |
| <input type="checkbox"/> Other: <input type="text"/>  |                                                      |

Stop screening for this patient if you have selected to investigate glomerular disorder phenotype and no kidney biopsy findings were observed.

**Road Map for Eligibility Check Using DIRI Criteria**

26. Based on the phenotype and DIRI criteria specified in the following, please answer questions in the pertinent sections to determine patient's eligibility for enrollment with this study:

- |                                                                                                    |                                  |
|----------------------------------------------------------------------------------------------------|----------------------------------|
| <input type="radio"/> AKI phenotype with AKIN stage 2 criteria based on rising serum creatinine    | ----> Complete questions 27 - 29 |
| <input type="radio"/> AKI phenotype with AKIN stage 2 criteria based on declining serum creatinine | ----> Complete questions 30 - 32 |
| <input type="radio"/> Glomerular disorder phenotype                                                | ----> Complete questions 33 - 38 |

Patient ID:

Form input boxes for Patient ID

Form ID:

Form input boxes for Form ID

DR1 - CRF 01

AKI Phenotype - Primary Criteria for DIRI - AKIN Stage 2 - Rising Serum Creatinine

Rise in serum creatinine that presents as or progresses to AKIN Stage 2 (KDIGO) in relation to drug exposure.

27. Enter start date/time and stop date/time for the candidate drugs you selected in item 11:

Form for drug 1, 2, and 3 including drug ID, start/stop date/time, and NA checkboxes.

28. Scenario 1 - Use lowest creatinine value as reference

Form for Scenario 1 including reference creatinine, qualifying creatinine, and first creatinine data.

29. Scenario 2 - Use closest creatinine value as reference

Form for Scenario 2 including reference creatinine, qualifying creatinine, and first creatinine data.

Please log on to the DIRECT study website at https://www.obriendata.org/DIRECT, enter all the patient and drug information you have gathered here into the database so that the software will help you determine which drugs met the DIRI criteria. Then continue at question 39 on page 7 to complete the screening log.

Patient ID:

|  |  |  |  |  |  |
|--|--|--|--|--|--|
|  |  |  |  |  |  |
|--|--|--|--|--|--|

Form ID:

|  |  |  |  |  |  |   |  |  |  |  |  |  |
|--|--|--|--|--|--|---|--|--|--|--|--|--|
|  |  |  |  |  |  | - |  |  |  |  |  |  |
|--|--|--|--|--|--|---|--|--|--|--|--|--|

DR1 - CRF 01

**AKI Phenotype - Primary Criteria for DIRI - AKIN Stage 2 - Declining Serum Creatinine**

Decline in serum creatinine as defined by AKIN Stage 2 (KDIGO) in relation to drug dose reduction or drug stopping.

Note: This section is not applicable to pediatric patients if the peak creatinine during drug exposure did not exceed 0.5 mg/dL or 44.2 umol/L.

**30. Which of the following scenarios will be used for evaluation of DIRI eligibility?**

- Decline in serum creatinine in relation to dose reduction  
 Decline in serum creatinine in relation to drug stopping

**31. Enter start date/time, and date/time of first dose reduction after peak serum creatinine or date/time when drug stopped for the candidate drugs you selected in item 11:**

- a. Drug 1 (primary drug) Drug ID:**

|  |  |  |  |
|--|--|--|--|
|  |  |  |  |
|--|--|--|--|

 (copy drug ID from item 11a.)
- i. Start Date/Time:**

|  |  |
|--|--|
|  |  |
|--|--|

 / 

|  |  |
|--|--|
|  |  |
|--|--|

 / 

|  |  |  |  |
|--|--|--|--|
|  |  |  |  |
|--|--|--|--|

 (mm/dd/yyyy) 

|  |  |
|--|--|
|  |  |
|--|--|

 : 

|  |  |
|--|--|
|  |  |
|--|--|

 (24hr clock)
- ii. Dose Reduction or Drug Stopping Date/Time:**

|  |  |
|--|--|
|  |  |
|--|--|

 / 

|  |  |
|--|--|
|  |  |
|--|--|

 / 

|  |  |  |  |
|--|--|--|--|
|  |  |  |  |
|--|--|--|--|

 (mm/dd/yyyy) 

|  |  |
|--|--|
|  |  |
|--|--|

 : 

|  |  |
|--|--|
|  |  |
|--|--|

 (24hr clock)  NA
- b. Drug 2 (optional drug) Drug ID:**

|  |  |  |  |
|--|--|--|--|
|  |  |  |  |
|--|--|--|--|

 (copy drug ID from item 11b.)
- i. Start Date/Time:**

|  |  |
|--|--|
|  |  |
|--|--|

 / 

|  |  |
|--|--|
|  |  |
|--|--|

 / 

|  |  |  |  |
|--|--|--|--|
|  |  |  |  |
|--|--|--|--|

 (mm/dd/yyyy) 

|  |  |
|--|--|
|  |  |
|--|--|

 : 

|  |  |
|--|--|
|  |  |
|--|--|

 (24hr clock)
- ii. Dose Reduction or Drug Stopping Date/Time:**

|  |  |
|--|--|
|  |  |
|--|--|

 / 

|  |  |
|--|--|
|  |  |
|--|--|

 / 

|  |  |  |  |
|--|--|--|--|
|  |  |  |  |
|--|--|--|--|

 (mm/dd/yyyy) 

|  |  |
|--|--|
|  |  |
|--|--|

 : 

|  |  |
|--|--|
|  |  |
|--|--|

 (24hr clock)  NA
- c. Drug 3 (optional drug) Drug ID:**

|  |  |  |  |
|--|--|--|--|
|  |  |  |  |
|--|--|--|--|

 (copy drug ID from item 11c.)
- i. Start Date/Time:**

|  |  |
|--|--|
|  |  |
|--|--|

 / 

|  |  |
|--|--|
|  |  |
|--|--|

 / 

|  |  |  |  |
|--|--|--|--|
|  |  |  |  |
|--|--|--|--|

 (mm/dd/yyyy) 

|  |  |
|--|--|
|  |  |
|--|--|

 : 

|  |  |
|--|--|
|  |  |
|--|--|

 (24hr clock)
- ii. Dose Reduction or Drug Stopping Date/Time:**

|  |  |
|--|--|
|  |  |
|--|--|

 / 

|  |  |
|--|--|
|  |  |
|--|--|

 / 

|  |  |  |  |
|--|--|--|--|
|  |  |  |  |
|--|--|--|--|

 (mm/dd/yyyy) 

|  |  |
|--|--|
|  |  |
|--|--|

 : 

|  |  |
|--|--|
|  |  |
|--|--|

 (24hr clock)  NA

**32. a. Reference Creatinine - Peak SCr during drug exposure. (must be at least 0.5 mg/dL or 44.2 umol/L for children)**

- i. Creatinine:**

|  |  |  |  |
|--|--|--|--|
|  |  |  |  |
|--|--|--|--|

 . 

|  |  |
|--|--|
|  |  |
|--|--|

 mg/dL  
 umol/L
- ii. Date/Time:**

|  |  |
|--|--|
|  |  |
|--|--|

 / 

|  |  |
|--|--|
|  |  |
|--|--|

 / 

|  |  |  |  |
|--|--|--|--|
|  |  |  |  |
|--|--|--|--|

 (mm/dd/yyyy) 

|  |  |
|--|--|
|  |  |
|--|--|

 : 

|  |  |
|--|--|
|  |  |
|--|--|

 (24hr clock)

- b. Qualifying Creatinine - Multiply reference creatinine by 0.5:**

|  |  |  |  |
|--|--|--|--|
|  |  |  |  |
|--|--|--|--|

 . 

|  |  |
|--|--|
|  |  |
|--|--|

 mg/dL  
 umol/L

**c. First creatinine that is less than or equal to qualifying creatinine (32b) 24 hours after dose reduction or immediately after drug stopping:**

- i. Found occurrence:**  Yes  No
- ii. Creatinine:**

|  |  |  |  |
|--|--|--|--|
|  |  |  |  |
|--|--|--|--|

 . 

|  |  |
|--|--|
|  |  |
|--|--|

 mg/dL  
 umol/L
- iii. Data Date/Time:**

|  |  |
|--|--|
|  |  |
|--|--|

 / 

|  |  |
|--|--|
|  |  |
|--|--|

 / 

|  |  |  |  |
|--|--|--|--|
|  |  |  |  |
|--|--|--|--|

 (mm/dd/yyyy) 

|  |  |
|--|--|
|  |  |
|--|--|

 : 

|  |  |
|--|--|
|  |  |
|--|--|

 (24hr clock)

Please log on to the DIRECT study website at <https://www.obriendata.org/DIRECT>, enter all the patient and drug information you have gathered here into the database so that the software will help you determine which drugs met the DIRI criteria. Then continue at question 39 on page 7 to complete the screening log.

DIRI - CRF 01

Patient ID:

|  |  |  |  |  |  |
|--|--|--|--|--|--|
|  |  |  |  |  |  |
|--|--|--|--|--|--|

Form ID:

|  |  |  |  |  |  |   |  |  |  |  |  |
|--|--|--|--|--|--|---|--|--|--|--|--|
|  |  |  |  |  |  | - |  |  |  |  |  |
|--|--|--|--|--|--|---|--|--|--|--|--|

**Glomerular Disease Phenotype - Primary Criteria for DIRI - UA & UC**

33. Enter start date/time and stop date/time for the candidate drugs you selected in item 11:

- a. Drug 1 (primary drug) Drug ID: 

|  |  |  |
|--|--|--|
|  |  |  |
|--|--|--|

 (copy drug ID from item 11a.)
- i. Start Date/Time: 

|  |  |
|--|--|
|  |  |
|--|--|

 / 

|  |  |
|--|--|
|  |  |
|--|--|

 / 

|  |  |  |  |
|--|--|--|--|
|  |  |  |  |
|--|--|--|--|

 (mm/dd/yyyy) 

|  |  |
|--|--|
|  |  |
|--|--|

 : 

|  |  |
|--|--|
|  |  |
|--|--|

 (24hr clock)
- ii. Stop Date/Time: 

|  |  |
|--|--|
|  |  |
|--|--|

 / 

|  |  |
|--|--|
|  |  |
|--|--|

 / 

|  |  |  |  |
|--|--|--|--|
|  |  |  |  |
|--|--|--|--|

 (mm/dd/yyyy) 

|  |  |
|--|--|
|  |  |
|--|--|

 : 

|  |  |
|--|--|
|  |  |
|--|--|

 (24hr clock)  NA
- b. Drug 2 (optional drug) Drug ID: 

|  |  |  |
|--|--|--|
|  |  |  |
|--|--|--|

 (copy drug ID from item 11b.)
- i. Start Date/Time: 

|  |  |
|--|--|
|  |  |
|--|--|

 / 

|  |  |
|--|--|
|  |  |
|--|--|

 / 

|  |  |  |  |
|--|--|--|--|
|  |  |  |  |
|--|--|--|--|

 (mm/dd/yyyy) 

|  |  |
|--|--|
|  |  |
|--|--|

 : 

|  |  |
|--|--|
|  |  |
|--|--|

 (24hr clock)
- ii. Stop Date/Time: 

|  |  |
|--|--|
|  |  |
|--|--|

 / 

|  |  |
|--|--|
|  |  |
|--|--|

 / 

|  |  |  |  |
|--|--|--|--|
|  |  |  |  |
|--|--|--|--|

 (mm/dd/yyyy) 

|  |  |
|--|--|
|  |  |
|--|--|

 : 

|  |  |
|--|--|
|  |  |
|--|--|

 (24hr clock)  NA
- c. Drug 3 (optional drug) Drug ID: 

|  |  |  |
|--|--|--|
|  |  |  |
|--|--|--|

 (copy drug ID from item 11c.)
- i. Start Date/Time: 

|  |  |
|--|--|
|  |  |
|--|--|

 / 

|  |  |
|--|--|
|  |  |
|--|--|

 / 

|  |  |  |  |
|--|--|--|--|
|  |  |  |  |
|--|--|--|--|

 (mm/dd/yyyy) 

|  |  |
|--|--|
|  |  |
|--|--|

 : 

|  |  |
|--|--|
|  |  |
|--|--|

 (24hr clock)
- ii. Stop Date/Time: 

|  |  |
|--|--|
|  |  |
|--|--|

 / 

|  |  |
|--|--|
|  |  |
|--|--|

 / 

|  |  |  |  |
|--|--|--|--|
|  |  |  |  |
|--|--|--|--|

 (mm/dd/yyyy) 

|  |  |
|--|--|
|  |  |
|--|--|

 : 

|  |  |
|--|--|
|  |  |
|--|--|

 (24hr clock)  NA

34.  Yes  No  No Data Did patient have elevated proteinuria that met the following criteria following exposure to drug?Adult patient

24-hour urine collection &gt; 1000 mg

Pediatric patient24-hour urine collection > 100 mg/m<sup>2</sup>/dayRandom urine collection > 4 mg/m<sup>2</sup>/hr

If Yes, record the incidence in the following:

- a. Protein: 

|  |  |  |  |
|--|--|--|--|
|  |  |  |  |
|--|--|--|--|

 mg/day  mg/m<sup>2</sup>/day  
 mg/m<sup>2</sup>/hr
- b. Data Date/Time: 

|  |  |
|--|--|
|  |  |
|--|--|

 / 

|  |  |
|--|--|
|  |  |
|--|--|

 / 

|  |  |  |  |
|--|--|--|--|
|  |  |  |  |
|--|--|--|--|

 (mm/dd/yyyy) 

|  |  |
|--|--|
|  |  |
|--|--|

 : 

|  |  |
|--|--|
|  |  |
|--|--|

 (24hr clock)

35.  Yes  No  No Data Did patient's urine protein creatinine ratio (UPC) exceed 0.8 following exposure to drug?

If Yes, record the incidence in the following:

- a. UPC: 

|  |  |
|--|--|
|  |  |
|--|--|

 . 

|  |  |
|--|--|
|  |  |
|--|--|
- b. Data Date/Time: 

|  |  |
|--|--|
|  |  |
|--|--|

 / 

|  |  |
|--|--|
|  |  |
|--|--|

 / 

|  |  |  |  |
|--|--|--|--|
|  |  |  |  |
|--|--|--|--|

 (mm/dd/yyyy) 

|  |  |
|--|--|
|  |  |
|--|--|

 : 

|  |  |
|--|--|
|  |  |
|--|--|

 (24hr clock)

36.  Yes  No  No Data Did patient's urinalysis show 2+ protein following exposure to drug?

If Yes, record the incidence in the following:

- a. Protein:  Negative  Trace  1+  2+  3+  4+  NA
- b. Data Date/Time: 

|  |  |
|--|--|
|  |  |
|--|--|

 / 

|  |  |
|--|--|
|  |  |
|--|--|

 / 

|  |  |  |  |
|--|--|--|--|
|  |  |  |  |
|--|--|--|--|

 (mm/dd/yyyy) 

|  |  |
|--|--|
|  |  |
|--|--|

 : 

|  |  |
|--|--|
|  |  |
|--|--|

 (24hr clock)

37.  Yes  No  No Data Did patient's urinalysis show > 50 RBC/HPF following exposure to drug?

If Yes, record the incidence in the following:

- a. Data Date/Time: 

|  |  |
|--|--|
|  |  |
|--|--|

 / 

|  |  |
|--|--|
|  |  |
|--|--|

 / 

|  |  |  |  |
|--|--|--|--|
|  |  |  |  |
|--|--|--|--|

 (mm/dd/yyyy) 

|  |  |
|--|--|
|  |  |
|--|--|

 : 

|  |  |
|--|--|
|  |  |
|--|--|

 (24hr clock)

38.  Yes  No  No Data Did patient's urinalysis show dysmorphic RBC following exposure to drug?

If Yes, record the incidence in the following:

- a. Data Date/Time: 

|  |  |
|--|--|
|  |  |
|--|--|

 / 

|  |  |
|--|--|
|  |  |
|--|--|

 / 

|  |  |  |  |
|--|--|--|--|
|  |  |  |  |
|--|--|--|--|

 (mm/dd/yyyy) 

|  |  |
|--|--|
|  |  |
|--|--|

 : 

|  |  |
|--|--|
|  |  |
|--|--|

 (24hr clock)

Please log on to the DIRECT study website at <https://www.obriendata.org/DIRECT>, enter all the patient and drug information you have gathered here into the database so that the software will help you determine which drugs met the DIRI criteria. Then continue at question 39 on page 7 to complete the screening log.

Patient ID:

|  |  |  |  |  |  |
|--|--|--|--|--|--|
|  |  |  |  |  |  |
|--|--|--|--|--|--|

Form ID:

|  |  |  |  |  |  |
|--|--|--|--|--|--|
|  |  |  |  |  |  |
|--|--|--|--|--|--|

 - 

|  |  |  |  |  |  |
|--|--|--|--|--|--|
|  |  |  |  |  |  |
|--|--|--|--|--|--|

DR1 - CRF 01

**Screening Summary**

39. Mark the drugs that met DIRI criteria according to the result of eligibility check on the DIRECT study website:

- Drug 1     Drug 2     Drug 3     None

40. Is patient eligible for this study? (Patient is eligible for study if patient passed all inclusion/exclusion criteria and any selected study drug met DIRI criteria.)

- Yes     No

**Informed Consent**

41. Was informed consent obtained?

Note: A signed informed consent must be obtained in order to enroll the patient unless your IRB has agreed that no consent is needed for this study or the patient has signed a consent waiver.

- Yes     No     No Consent Needed

42. If consent was obtained, answer the following questions:

a. Date Consent Signed:    



 / 



 / 



 (mm/dd/yyyy)

b. Who signed the consent?     Patient     Spouse     Patient Representative     Parent

c. Who obtained the consent?     Investigator     Coordinator     Other MD

43. If consent form was not obtained, mark below the primary reason for not obtaining consent:

- Patient decision                       Patient representative decision                       Physician decision  
 Death                                               Renal recovery                                               Site personnel issues  
 No one to give consent                       Discharged from hospital                                               Other

Patient ID:

|  |  |  |  |  |  |
|--|--|--|--|--|--|
|  |  |  |  |  |  |
|--|--|--|--|--|--|

Form ID:

|  |  |  |  |  |  |   |  |  |  |  |
|--|--|--|--|--|--|---|--|--|--|--|
|  |  |  |  |  |  | - |  |  |  |  |
|--|--|--|--|--|--|---|--|--|--|--|

DRI - CRF 01

**APPENDIX 1****CKD Stage 5 Creatinine Table - For Children of Age 2 - 17**

Following table shows the lowest creatinine (IDMS traceable) value that would result in eGFR 14 (CKD stage 5) for given height of a patient using Bedside Schwartz equation. This table is valid only for pediatric patients of age 2 - 17.

| Height<br>(cm) | Creatinine |        | Height<br>(cm) | Creatinine |        | Height<br>(cm) | Creatinine |        |
|----------------|------------|--------|----------------|------------|--------|----------------|------------|--------|
|                | mg/dL      | umol/L |                | mg/dL      | umol/L |                | mg/dL      | umol/L |
| 50             | 1.42       | 125.5  | 100            | 2.83       | 250.2  | 150            | 4.25       | 375.7  |
| 51             | 1.45       | 128.2  | 101            | 2.86       | 252.8  | 151            | 4.27       | 377.5  |
| 52             | 1.48       | 130.8  | 102            | 2.89       | 255.5  | 152            | 4.30       | 380.1  |
| 53             | 1.50       | 132.6  | 103            | 2.92       | 258.1  | 153            | 4.33       | 382.8  |
| 54             | 1.53       | 135.3  | 104            | 2.95       | 260.8  | 154            | 4.36       | 385.4  |
| 55             | 1.56       | 137.9  | 105            | 2.97       | 262.5  | 155            | 4.39       | 388.1  |
| 56             | 1.59       | 140.6  | 106            | 3.00       | 265.2  | 156            | 4.42       | 390.7  |
| 57             | 1.62       | 143.2  | 107            | 3.03       | 267.9  | 157            | 4.44       | 392.5  |
| 58             | 1.65       | 145.9  | 108            | 3.06       | 270.5  | 158            | 4.47       | 395.1  |
| 59             | 1.67       | 147.6  | 109            | 3.09       | 273.2  | 159            | 4.50       | 397.8  |
| 60             | 1.70       | 150.3  | 110            | 3.12       | 275.8  | 160            | 4.53       | 400.5  |
| 61             | 1.73       | 152.9  | 111            | 3.14       | 277.6  | 161            | 4.56       | 403.1  |
| 62             | 1.76       | 155.6  | 112            | 3.17       | 280.2  | 162            | 4.59       | 405.8  |
| 63             | 1.79       | 158.2  | 113            | 3.20       | 282.9  | 163            | 4.61       | 407.5  |
| 64             | 1.81       | 160.0  | 114            | 3.23       | 285.5  | 164            | 4.64       | 410.2  |
| 65             | 1.84       | 162.7  | 115            | 3.26       | 288.2  | 165            | 4.67       | 412.8  |
| 66             | 1.87       | 165.3  | 116            | 3.29       | 290.8  | 166            | 4.70       | 415.5  |
| 67             | 1.90       | 168.0  | 117            | 3.31       | 292.6  | 167            | 4.73       | 418.1  |
| 68             | 1.93       | 170.6  | 118            | 3.34       | 295.3  | 168            | 4.76       | 420.8  |
| 69             | 1.96       | 173.3  | 119            | 3.37       | 297.9  | 169            | 4.78       | 422.6  |
| 70             | 1.98       | 175.0  | 120            | 3.40       | 300.6  | 170            | 4.81       | 425.2  |
| 71             | 2.01       | 177.7  | 121            | 3.43       | 303.2  | 171            | 4.84       | 427.9  |
| 72             | 2.04       | 180.3  | 122            | 3.45       | 305.0  | 172            | 4.87       | 430.5  |
| 73             | 2.07       | 183.0  | 123            | 3.48       | 307.6  | 173            | 4.90       | 433.2  |
| 74             | 2.10       | 185.6  | 124            | 3.51       | 310.3  | 174            | 4.92       | 434.9  |
| 75             | 2.13       | 188.3  | 125            | 3.54       | 312.9  | 175            | 4.95       | 437.6  |
| 76             | 2.15       | 190.1  | 126            | 3.57       | 315.6  | 176            | 4.98       | 440.2  |
| 77             | 2.18       | 192.7  | 127            | 3.60       | 318.2  | 177            | 5.01       | 442.9  |
| 78             | 2.21       | 195.4  | 128            | 3.62       | 320.0  | 178            | 5.04       | 445.5  |
| 79             | 2.24       | 198.0  | 129            | 3.65       | 322.7  | 179            | 5.07       | 448.2  |
| 80             | 2.27       | 200.7  | 130            | 3.68       | 325.3  | 180            | 5.09       | 450.0  |
| 81             | 2.30       | 203.3  | 131            | 3.71       | 328.0  | 181            | 5.12       | 452.6  |
| 82             | 2.32       | 205.1  | 132            | 3.74       | 330.6  | 182            | 5.15       | 455.3  |
| 83             | 2.35       | 207.7  | 133            | 3.77       | 333.3  | 183            | 5.18       | 457.9  |
| 84             | 2.38       | 210.4  | 134            | 3.79       | 335.0  | 184            | 5.21       | 460.6  |
| 85             | 2.41       | 213.0  | 135            | 3.82       | 337.7  | 185            | 5.24       | 463.2  |
| 86             | 2.44       | 215.7  | 136            | 3.85       | 340.3  | 186            | 5.26       | 465.0  |
| 87             | 2.46       | 217.5  | 137            | 3.88       | 343.0  | 187            | 5.29       | 467.6  |
| 88             | 2.49       | 220.1  | 138            | 3.91       | 345.6  | 188            | 5.32       | 470.3  |
| 89             | 2.52       | 222.8  | 139            | 3.94       | 348.3  | 189            | 5.35       | 472.9  |
| 90             | 2.55       | 225.4  | 140            | 3.96       | 350.1  | 190            | 5.38       | 475.6  |
| 91             | 2.58       | 228.1  | 141            | 3.99       | 352.7  | 191            | 5.41       | 478.2  |
| 92             | 2.61       | 230.7  | 142            | 4.02       | 355.4  | 192            | 5.43       | 480.0  |
| 93             | 2.63       | 232.5  | 143            | 4.05       | 358.0  | 193            | 5.46       | 482.7  |
| 94             | 2.66       | 235.1  | 144            | 4.08       | 360.7  | 194            | 5.49       | 485.3  |
| 95             | 2.69       | 237.8  | 145            | 4.11       | 363.3  | 195            | 5.52       | 488.0  |
| 96             | 2.72       | 240.4  | 146            | 4.13       | 365.1  | 196            | 5.55       | 490.6  |
| 97             | 2.75       | 243.1  | 147            | 4.16       | 367.7  | 197            | 5.58       | 493.3  |
| 98             | 2.78       | 245.8  | 148            | 4.19       | 370.4  | 198            | 5.60       | 495.0  |
| 99             | 2.80       | 247.5  | 149            | 4.22       | 373.0  | 199            | 5.63       | 497.7  |



Patient ID:

|  |  |  |  |  |  |
|--|--|--|--|--|--|
|  |  |  |  |  |  |
|--|--|--|--|--|--|

Form ID:

|  |  |  |  |  |  |   |  |  |  |  |
|--|--|--|--|--|--|---|--|--|--|--|
|  |  |  |  |  |  | - |  |  |  |  |
|--|--|--|--|--|--|---|--|--|--|--|

DR1 - CRF 01

**APPENDIX 2****CKD Stage 5 Creatinine Table - For Patients of Age 18 and Older**

Following table shows the lowest creatinine (IDMS traceable) value that would result in eGFR 14 (CKD stage 5) for given age, gender, and race of a patient using CKD-EPI equation. This table is valid only for adult patients of age 18 and older.

| Age | Creatinine mg/dl |       |        |       | Age | Creatinine umol/L |       |        |       |
|-----|------------------|-------|--------|-------|-----|-------------------|-------|--------|-------|
|     | Male             |       | Female |       |     | Male              |       | Female |       |
|     | Black            | Other | Black  | Other |     | Black             | Other | Black  | Other |
| 18  | 6.02             | 5.32  | 4.75   | 4.20  | 18  | 532.2             | 470.3 | 419.9  | 371.3 |
| 19  | 5.98             | 5.29  | 4.72   | 4.18  | 19  | 528.6             | 467.6 | 417.2  | 369.5 |
| 20  | 5.95             | 5.26  | 4.69   | 4.16  | 20  | 526.0             | 465.0 | 414.6  | 367.7 |
| 21  | 5.91             | 5.23  | 4.67   | 4.13  | 21  | 522.4             | 462.3 | 412.8  | 365.1 |
| 22  | 5.88             | 5.20  | 4.64   | 4.11  | 22  | 519.8             | 459.7 | 410.2  | 363.3 |
| 23  | 5.84             | 5.17  | 4.61   | 4.08  | 23  | 516.3             | 457.0 | 407.5  | 360.7 |
| 24  | 5.81             | 5.14  | 4.59   | 4.06  | 24  | 513.6             | 454.4 | 405.8  | 358.9 |
| 25  | 5.78             | 5.11  | 4.56   | 4.04  | 25  | 511.0             | 451.7 | 403.1  | 357.1 |
| 26  | 5.74             | 5.08  | 4.53   | 4.01  | 26  | 507.4             | 449.1 | 400.5  | 354.5 |
| 27  | 5.71             | 5.05  | 4.51   | 3.99  | 27  | 504.8             | 446.4 | 398.7  | 352.7 |
| 28  | 5.68             | 5.02  | 4.48   | 3.97  | 28  | 502.1             | 443.8 | 396.0  | 350.9 |
| 29  | 5.64             | 5.00  | 4.46   | 3.94  | 29  | 498.6             | 442.0 | 394.3  | 348.3 |
| 30  | 5.61             | 4.97  | 4.43   | 3.92  | 30  | 495.9             | 439.3 | 391.6  | 346.5 |
| 31  | 5.58             | 4.94  | 4.40   | 3.90  | 31  | 493.3             | 436.7 | 389.0  | 344.8 |
| 32  | 5.55             | 4.91  | 4.38   | 3.88  | 32  | 490.6             | 434.0 | 387.2  | 343.0 |
| 33  | 5.51             | 4.88  | 4.35   | 3.85  | 33  | 487.1             | 431.4 | 384.5  | 340.3 |
| 34  | 5.48             | 4.85  | 4.33   | 3.83  | 34  | 484.4             | 428.7 | 382.8  | 338.6 |
| 35  | 5.45             | 4.82  | 4.30   | 3.81  | 35  | 481.8             | 426.1 | 380.1  | 336.8 |
| 36  | 5.42             | 4.80  | 4.28   | 3.79  | 36  | 479.1             | 424.3 | 378.4  | 335.0 |
| 37  | 5.39             | 4.77  | 4.25   | 3.77  | 37  | 476.5             | 421.7 | 375.7  | 333.3 |
| 38  | 5.36             | 4.74  | 4.23   | 3.74  | 38  | 473.8             | 419.0 | 373.9  | 330.6 |
| 39  | 5.33             | 4.71  | 4.20   | 3.72  | 39  | 471.2             | 416.4 | 371.3  | 328.8 |
| 40  | 5.29             | 4.69  | 4.18   | 3.70  | 40  | 467.6             | 414.6 | 369.5  | 327.1 |
| 41  | 5.26             | 4.66  | 4.16   | 3.68  | 41  | 465.0             | 411.9 | 367.7  | 325.3 |
| 42  | 5.23             | 4.63  | 4.13   | 3.66  | 42  | 462.3             | 409.3 | 365.1  | 323.5 |
| 43  | 5.20             | 4.61  | 4.11   | 3.64  | 43  | 459.7             | 407.5 | 363.3  | 321.8 |
| 44  | 5.17             | 4.58  | 4.08   | 3.62  | 44  | 457.0             | 404.9 | 360.7  | 320.0 |
| 45  | 5.14             | 4.55  | 4.06   | 3.59  | 45  | 454.4             | 402.2 | 358.9  | 317.4 |
| 46  | 5.11             | 4.53  | 4.04   | 3.57  | 46  | 451.7             | 400.5 | 357.1  | 315.6 |
| 47  | 5.08             | 4.50  | 4.01   | 3.55  | 47  | 449.1             | 397.8 | 354.5  | 313.8 |
| 48  | 5.05             | 4.47  | 3.99   | 3.53  | 48  | 446.4             | 395.1 | 352.7  | 312.1 |
| 49  | 5.02             | 4.45  | 3.97   | 3.51  | 49  | 443.8             | 393.4 | 350.9  | 310.3 |
| 50  | 5.00             | 4.42  | 3.94   | 3.49  | 50  | 442.0             | 390.7 | 348.3  | 308.5 |
| 51  | 4.97             | 4.40  | 3.92   | 3.47  | 51  | 439.3             | 389.0 | 346.5  | 306.7 |
| 52  | 4.94             | 4.37  | 3.90   | 3.45  | 52  | 436.7             | 386.3 | 344.8  | 305.0 |
| 53  | 4.91             | 4.35  | 3.88   | 3.43  | 53  | 434.0             | 384.5 | 343.0  | 303.2 |
| 54  | 4.88             | 4.32  | 3.85   | 3.41  | 54  | 431.4             | 381.9 | 340.3  | 301.4 |
| 55  | 4.85             | 4.30  | 3.83   | 3.39  | 55  | 428.7             | 380.1 | 338.6  | 299.7 |
| 56  | 4.82             | 4.27  | 3.81   | 3.37  | 56  | 426.1             | 377.5 | 336.8  | 297.9 |
| 57  | 4.80             | 4.25  | 3.79   | 3.35  | 57  | 424.3             | 375.7 | 335.0  | 296.1 |
| 58  | 4.77             | 4.22  | 3.77   | 3.33  | 58  | 421.7             | 373.0 | 333.3  | 294.4 |
| 59  | 4.74             | 4.20  | 3.74   | 3.31  | 59  | 419.0             | 371.3 | 330.6  | 292.6 |
| 60  | 4.71             | 4.17  | 3.72   | 3.29  | 60  | 416.4             | 368.6 | 328.8  | 290.8 |
| 61  | 4.69             | 4.15  | 3.70   | 3.28  | 61  | 414.6             | 366.9 | 327.1  | 290.0 |
| 62  | 4.66             | 4.12  | 3.68   | 3.26  | 62  | 411.9             | 364.2 | 325.3  | 288.2 |
| 63  | 4.63             | 4.10  | 3.66   | 3.24  | 63  | 409.3             | 362.4 | 323.5  | 286.4 |
| 64  | 4.61             | 4.08  | 3.64   | 3.22  | 64  | 407.5             | 360.7 | 321.8  | 284.6 |
| 65  | 4.58             | 4.05  | 3.62   | 3.20  | 65  | 404.9             | 358.0 | 320.0  | 282.9 |

--- To be continued on next page ---

Patient ID:

|  |  |  |  |  |  |
|--|--|--|--|--|--|
|  |  |  |  |  |  |
|--|--|--|--|--|--|

Form ID:

|  |  |  |  |  |  |   |  |  |  |  |
|--|--|--|--|--|--|---|--|--|--|--|
|  |  |  |  |  |  | - |  |  |  |  |
|--|--|--|--|--|--|---|--|--|--|--|

DR1 - CRF 01

**APPENDIX 2** (continued from page 11)**CKD Stage 5 Creatinine Table - For Patients of Age 18 and Older**

Following table shows the lowest creatinine (IDMS traceable) value that would result in eGFR 14 (CKD stage 5) for given age, gender, and race of a patient using CKD-EPI equation. This table is valid only for adult patients of age 18 and older.

| Age | Creatinine mg/dl |       |        |       | Age | Creatinine umol/L |       |        |       |
|-----|------------------|-------|--------|-------|-----|-------------------|-------|--------|-------|
|     | Male             |       | Female |       |     | Male              |       | Female |       |
|     | Black            | Other | Black  | Other |     | Black             | Other | Black  | Other |
| 66  | 4.55             | 4.03  | 3.59   | 3.18  | 66  | 402.2             | 356.3 | 317.4  | 281.1 |
| 67  | 4.53             | 4.01  | 3.57   | 3.16  | 67  | 400.5             | 354.5 | 315.6  | 279.3 |
| 68  | 4.50             | 3.98  | 3.55   | 3.15  | 68  | 397.8             | 351.8 | 313.8  | 278.5 |
| 69  | 4.47             | 3.96  | 3.53   | 3.13  | 69  | 395.1             | 350.1 | 312.1  | 276.7 |
| 70  | 4.45             | 3.94  | 3.51   | 3.11  | 70  | 393.4             | 348.3 | 310.3  | 274.9 |
| 71  | 4.42             | 3.91  | 3.49   | 3.09  | 71  | 390.7             | 345.6 | 308.5  | 273.2 |
| 72  | 4.40             | 3.89  | 3.47   | 3.07  | 72  | 389.0             | 343.9 | 306.7  | 271.4 |
| 73  | 4.37             | 3.87  | 3.45   | 3.06  | 73  | 386.3             | 342.1 | 305.0  | 270.5 |
| 74  | 4.35             | 3.85  | 3.43   | 3.04  | 74  | 384.5             | 340.3 | 303.2  | 268.7 |
| 75  | 4.32             | 3.83  | 3.41   | 3.02  | 75  | 381.9             | 338.6 | 301.4  | 267.0 |
| 76  | 4.30             | 3.80  | 3.39   | 3.00  | 76  | 380.1             | 335.9 | 299.7  | 265.2 |
| 77  | 4.27             | 3.78  | 3.37   | 2.99  | 77  | 377.5             | 334.2 | 297.9  | 264.3 |
| 78  | 4.25             | 3.76  | 3.35   | 2.97  | 78  | 375.7             | 332.4 | 296.1  | 262.5 |
| 79  | 4.22             | 3.74  | 3.33   | 2.95  | 79  | 373.0             | 330.6 | 294.4  | 260.8 |
| 80  | 4.20             | 3.72  | 3.31   | 2.93  | 80  | 371.3             | 328.8 | 292.6  | 259.0 |
| 81  | 4.17             | 3.69  | 3.30   | 2.92  | 81  | 368.6             | 326.2 | 291.7  | 258.1 |
| 82  | 4.15             | 3.67  | 3.28   | 2.90  | 82  | 366.9             | 324.4 | 290.0  | 256.4 |
| 83  | 4.12             | 3.65  | 3.26   | 2.88  | 83  | 364.2             | 322.7 | 288.2  | 254.6 |
| 84  | 4.10             | 3.63  | 3.24   | 2.87  | 84  | 362.4             | 320.9 | 286.4  | 253.7 |
| 85  | 4.08             | 3.61  | 3.22   | 2.85  | 85  | 360.7             | 319.1 | 284.6  | 251.9 |
| 86  | 4.05             | 3.59  | 3.20   | 2.83  | 86  | 358.0             | 317.4 | 282.9  | 250.2 |
| 87  | 4.03             | 3.57  | 3.18   | 2.82  | 87  | 356.3             | 315.6 | 281.1  | 249.3 |
| 88  | 4.01             | 3.55  | 3.16   | 2.80  | 88  | 354.5             | 313.8 | 279.3  | 247.5 |
| 89  | 3.98             | 3.53  | 3.15   | 2.78  | 89  | 351.8             | 312.1 | 278.5  | 245.8 |
| 90  | 3.96             | 3.51  | 3.13   | 2.77  | 90  | 350.1             | 310.3 | 276.7  | 244.9 |
| 91  | 3.94             | 3.49  | 3.11   | 2.75  | 91  | 348.3             | 308.5 | 274.9  | 243.1 |
| 92  | 3.92             | 3.47  | 3.09   | 2.74  | 92  | 346.5             | 306.7 | 273.2  | 242.2 |
| 93  | 3.89             | 3.45  | 3.07   | 2.72  | 93  | 343.9             | 305.0 | 271.4  | 240.4 |
| 94  | 3.87             | 3.43  | 3.06   | 2.71  | 94  | 342.1             | 303.2 | 270.5  | 239.6 |
| 95  | 3.85             | 3.41  | 3.04   | 2.69  | 95  | 340.3             | 301.4 | 268.7  | 237.8 |
| 96  | 3.83             | 3.39  | 3.02   | 2.67  | 96  | 338.6             | 299.7 | 267.0  | 236.0 |
| 97  | 3.80             | 3.37  | 3.00   | 2.66  | 97  | 335.9             | 297.9 | 265.2  | 235.1 |
| 98  | 3.78             | 3.35  | 2.99   | 2.64  | 98  | 334.2             | 296.1 | 264.3  | 233.4 |
| 99  | 3.76             | 3.33  | 2.97   | 2.63  | 99  | 332.4             | 294.4 | 262.5  | 232.5 |

**Patient ID:**  

|  |  |  |  |  |  |
|--|--|--|--|--|--|
|  |  |  |  |  |  |
|--|--|--|--|--|--|

**Form ID:**  

|  |  |  |  |  |  |
|--|--|--|--|--|--|
|  |  |  |  |  |  |
|--|--|--|--|--|--|

 - 

|  |  |  |  |  |  |
|--|--|--|--|--|--|
|  |  |  |  |  |  |
|--|--|--|--|--|--|

DR1 - CRF 01

**APPENDIX 3**

**Decision Flow for DIRI Eligibility Check**

Eligibility assessment for AKI phenotype with AKIN stage 2 criteria based on rising serum creatinine:

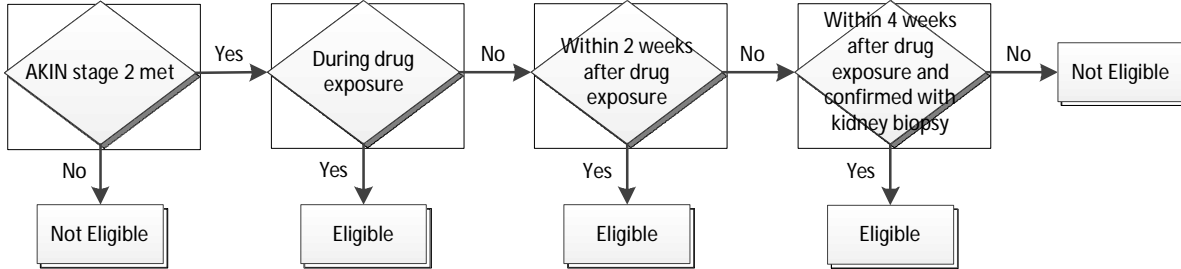

Eligibility assessment for AKI phenotype with AKIN stage 2 criteria based on declining serum creatinine:

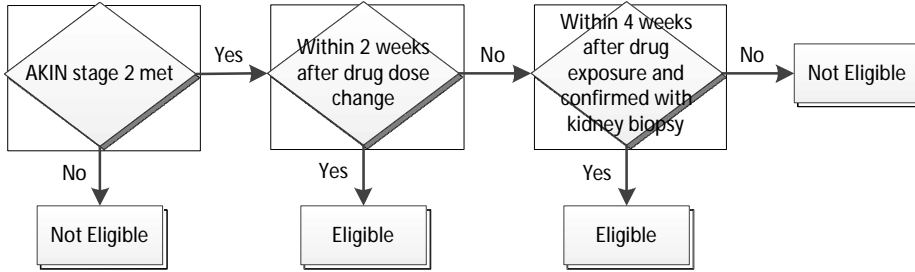

Eligibility assessment for Glomerular Disorder phenotype:

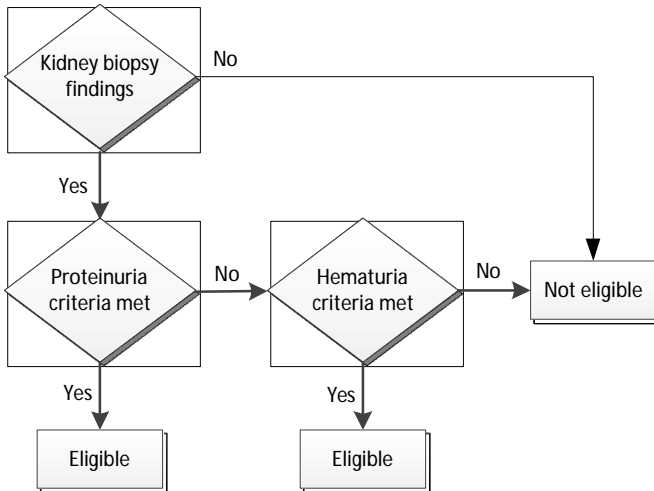



**Genomics of Drug Induced Renal Injury (DIRI): Racial Detail**

Patient ID:

Coordinator ID:

Form ID:

DR1 - CRF 02

|  |  |  |  |  |  |
|--|--|--|--|--|--|
|  |  |  |  |  |  |
|--|--|--|--|--|--|

|  |  |  |  |  |  |
|--|--|--|--|--|--|
|  |  |  |  |  |  |
|--|--|--|--|--|--|

|  |  |  |  |  |  |   |  |  |  |  |  |  |
|--|--|--|--|--|--|---|--|--|--|--|--|--|
|  |  |  |  |  |  | - |  |  |  |  |  |  |
|--|--|--|--|--|--|---|--|--|--|--|--|--|

Please review the following Race Code table and identify the best matching race categories for patient and patient's parents. This information will help better evaluate the genetic distribution of study participants in terms of race. We understand that racial origin is self reported by patient or documented in patient's medical records. We appreciate it may be difficult to obtain the requested information and would be very grateful for any information provided by the patient.

| Self-Reporting Race Identification (Based on Modified CDC Race and Ethnicity Code Set v1.0) |                          |                 |                                                                                                                            |                                                                      |                                                                                                                                                                          |     |         |
|---------------------------------------------------------------------------------------------|--------------------------|-----------------|----------------------------------------------------------------------------------------------------------------------------|----------------------------------------------------------------------|--------------------------------------------------------------------------------------------------------------------------------------------------------------------------|-----|---------|
| Race Group                                                                                  | Race Code                | Description     | Race Group                                                                                                                 | Race Code                                                            | Description                                                                                                                                                              |     |         |
| AMERICAN INDIAN OR ALASKA NATIVE                                                            | 101                      | American Indian | BLACK                                                                                                                      | 309                                                                  | Jamaican                                                                                                                                                                 |     |         |
|                                                                                             | 102                      | Alaska Native   |                                                                                                                            | 310                                                                  | Tobagoan                                                                                                                                                                 |     |         |
| ASIAN                                                                                       | 201                      | Asian Indian    |                                                                                                                            | 311                                                                  | Trinidadian                                                                                                                                                              |     |         |
|                                                                                             | 202                      | Bangladeshi     |                                                                                                                            | 312                                                                  | West Indian                                                                                                                                                              |     |         |
|                                                                                             | 203                      | Bhutanese       |                                                                                                                            | 399                                                                  | Other Black                                                                                                                                                              |     |         |
|                                                                                             | 204                      | Burmese         | NATIVE HAWAIIAN OR OTHER PACIFIC ISLANDER                                                                                  | 401                                                                  | Polynesian (Native Hawaiian, Samoan, Tahitian, Tongan, Tokelauan)                                                                                                        |     |         |
|                                                                                             | 205                      | Cambodian       |                                                                                                                            | 402                                                                  | Micronesian (Guamanian or Chamorro, Guamanian, Chamorro, Mariana Islander, Marshallese, Palauan, Carolinian, Kosraean, Pohnpeian, Saipanese, Kiribati, Chuukese, Yapese) |     |         |
|                                                                                             | 206                      | Chinese         |                                                                                                                            |                                                                      |                                                                                                                                                                          |     |         |
|                                                                                             | 207                      | Taiwanese       |                                                                                                                            |                                                                      |                                                                                                                                                                          |     |         |
|                                                                                             | 208                      | Filipino        |                                                                                                                            |                                                                      |                                                                                                                                                                          |     |         |
|                                                                                             | 209                      | Hmong           |                                                                                                                            |                                                                      |                                                                                                                                                                          |     |         |
|                                                                                             | 210                      | Indonesian      |                                                                                                                            |                                                                      |                                                                                                                                                                          |     |         |
|                                                                                             | 211                      | Japanese        |                                                                                                                            |                                                                      |                                                                                                                                                                          |     |         |
|                                                                                             | 212                      | Korean          |                                                                                                                            |                                                                      |                                                                                                                                                                          |     |         |
|                                                                                             | 213                      | Laotian         |                                                                                                                            |                                                                      |                                                                                                                                                                          |     |         |
|                                                                                             | 214                      | Malaysian       |                                                                                                                            |                                                                      |                                                                                                                                                                          |     |         |
|                                                                                             | 215                      | Okinawan        | WHITE                                                                                                                      | 403                                                                  | Melanesian (Fijian, Papua New Guinean, Solomon Islander, New Hebrides)                                                                                                   |     |         |
|                                                                                             | 216                      | Pakistani       |                                                                                                                            | 501                                                                  | European (Armenian, English, French, German, Irish, Italian, Polish, Spaniard, Scottish)                                                                                 |     |         |
|                                                                                             | 217                      | Sri Lankan      |                                                                                                                            |                                                                      |                                                                                                                                                                          |     |         |
| 218                                                                                         | Thai                     |                 |                                                                                                                            |                                                                      |                                                                                                                                                                          |     |         |
| 219                                                                                         | Vietnamese               |                 |                                                                                                                            |                                                                      |                                                                                                                                                                          |     |         |
| 220                                                                                         | Iwo Jiman                |                 |                                                                                                                            |                                                                      |                                                                                                                                                                          |     |         |
| 221                                                                                         | Maldivian                |                 |                                                                                                                            |                                                                      |                                                                                                                                                                          |     |         |
| 222                                                                                         | Nepalese                 |                 |                                                                                                                            |                                                                      |                                                                                                                                                                          |     |         |
| 223                                                                                         | Singaporean              |                 |                                                                                                                            |                                                                      |                                                                                                                                                                          |     |         |
| 224                                                                                         | Madagascar               |                 |                                                                                                                            |                                                                      |                                                                                                                                                                          |     |         |
| 299                                                                                         | Other Asian              | 502             | Middle Eastern or North African (Assyrian, Egyptian, Iranian, Iraqi, Lebanese, Palestinian, Syrian, Afghanistani, Israeli) |                                                                      |                                                                                                                                                                          |     |         |
| BLACK                                                                                       | 301                      |                 |                                                                                                                            | Black                                                                | HISPANIC OR LATINO                                                                                                                                                       | 602 | Mexican |
|                                                                                             | 302                      |                 |                                                                                                                            | African American                                                     |                                                                                                                                                                          |     |         |
|                                                                                             | 303                      |                 |                                                                                                                            | African (Botswanan, Ethiopian, Liberian, Nambian, Nigerian, Zairean) |                                                                                                                                                                          |     |         |
|                                                                                             | 304                      |                 |                                                                                                                            | Bahamian                                                             |                                                                                                                                                                          |     |         |
|                                                                                             | 305                      |                 |                                                                                                                            | Barbadian                                                            |                                                                                                                                                                          |     |         |
|                                                                                             | 306                      |                 |                                                                                                                            | Dominican                                                            |                                                                                                                                                                          |     |         |
|                                                                                             | 307                      |                 |                                                                                                                            | Dominican Islander                                                   |                                                                                                                                                                          |     |         |
|                                                                                             | 308                      |                 |                                                                                                                            | Haitian                                                              |                                                                                                                                                                          |     |         |
| 503                                                                                         | Arab                     |                 |                                                                                                                            |                                                                      |                                                                                                                                                                          |     |         |
| 599                                                                                         | Other White              |                 |                                                                                                                            |                                                                      |                                                                                                                                                                          |     |         |
| 603                                                                                         | Central American         |                 |                                                                                                                            |                                                                      |                                                                                                                                                                          |     |         |
| 604                                                                                         | South American           |                 |                                                                                                                            |                                                                      |                                                                                                                                                                          |     |         |
| 605                                                                                         | Latin American           |                 |                                                                                                                            |                                                                      |                                                                                                                                                                          |     |         |
| 606                                                                                         | Puerto Rican             |                 |                                                                                                                            |                                                                      |                                                                                                                                                                          |     |         |
| 607                                                                                         | Cuban                    |                 |                                                                                                                            |                                                                      |                                                                                                                                                                          |     |         |
| 608                                                                                         | Dominican                |                 |                                                                                                                            |                                                                      |                                                                                                                                                                          |     |         |
| 699                                                                                         | Other Hispanic or Latino |                 |                                                                                                                            |                                                                      |                                                                                                                                                                          |     |         |
| 998                                                                                         | Not Reported             |                 |                                                                                                                            |                                                                      |                                                                                                                                                                          |     |         |
| 999                                                                                         | Other Race               |                 |                                                                                                                            |                                                                      |                                                                                                                                                                          |     |         |

**1. Patient Self**

a. Race Code:

|  |  |  |
|--|--|--|
|  |  |  |
|--|--|--|

b. Country of Birth:

|  |
|--|
|  |
|--|

NA

c. City of Birth:

|  |
|--|
|  |
|--|

NA

2. Mother's Race Code:

|  |  |  |  |  |  |  |  |
|--|--|--|--|--|--|--|--|
|  |  |  |  |  |  |  |  |
|--|--|--|--|--|--|--|--|

(Up to two race codes may be entered for each parent.)

3. Father's Race Code:

|  |  |  |  |  |  |  |  |
|--|--|--|--|--|--|--|--|
|  |  |  |  |  |  |  |  |
|--|--|--|--|--|--|--|--|

(Up to two race codes may be entered for each parent.)

Patient ID:

|  |  |  |  |  |  |
|--|--|--|--|--|--|
|  |  |  |  |  |  |
|--|--|--|--|--|--|

Coordinator ID:

|  |  |  |  |  |  |
|--|--|--|--|--|--|
|  |  |  |  |  |  |
|--|--|--|--|--|--|

Form ID:

|  |  |  |  |  |  |   |  |  |  |  |  |  |
|--|--|--|--|--|--|---|--|--|--|--|--|--|
|  |  |  |  |  |  | - |  |  |  |  |  |  |
|--|--|--|--|--|--|---|--|--|--|--|--|--|

DR1 - CRF 03

Please enter medical history from hospital admission for inpatient or medical history within three months of DIRI for outpatient.

1. Date Obtained: 



 / 



 / 



 (mm/dd/yyyy)

2. Please enter up to 2000 characters in the following box the reason for hospital admission for inpatient, or the chief complaint or reason for followup at clinic for outpatient. Include any nephrologist diagnosis if available.

|  |
|--|
|  |
|--|

3. Hypertension:  Present  Absent  No Data

4. Diabetes Mellitus:  Present  Absent  No Data

5. Chronic Obstructive Pulmonary Disease:  Present  Absent  No Data

6. Cardiac

a. Coronary Artery Disease:  Present  Absent  No Data

b. Congestive Heart Failure:  Present  Absent  No Data

7. Peripheral Vascular Disease  Present  Absent  No Data

8. Immunocompromised

a. HIV-Positive/ARC:  Present  Absent  No Data

b. AIDS:  Present  Absent  No Data

c. Non-Renal Organ Transplant  Present  Absent  No Data

**If Yes, specify type of transplant:** (Check all that apply.)

Liver  Heart  Lung  Other

9. Liver Disease

a. Cirrhosis of Liver:  Present  Absent  No Data

b. Hepatic Failure with Encephalopathy or Coma:  Present  Absent  No Data

c. Other Liver Disease:  Present  Absent  No Data

Patient ID:

Coordinator ID:

Form ID:

 - 

DR1 - CRF 03

**10. Malignancy**

- a. Solid Tumor with Metastasis:  Present  Absent  No Data
- b. Hodgkins Lymphoma:  Present  Absent  No Data
- c. Non-Hodgkins Lymphoma:  Present  Absent  No Data
- d. Leukemia/Myelomas:  Present  Absent  No Data
- e. Other Cancers:  Present  Absent  No Data
- f. Chemotherapy:  Present  Absent  No Data
- g. Radiation Therapy:  Present  Absent  No Data
- h. Other Cancer Therapy:  Present  Absent  No Data

**11. Autoimmune Disease:**

- 
- Present
- 
- Absent
- 
- No Data

**If Yes, please specify:** (Check all that apply.)

- Lupus  Rheumatoid Arthritis
- Scleroderma  Sjogren's Syndrome
- Other:

**12. Renal**

- a. Kidney Disease with No Dialysis:  Present  Absent  No Data
- b. Kidney Disease with Past Dialysis:  Present  Absent  No Data

**If any primary kidney disease, please specify:** (check all that apply.)

- Glomerular Disease  PCKD
- Kidney Stones

**13. Allergic Disease:**

- 
- Present
- 
- Absent
- 
- No Data

**If Yes, please specify:** (Check all that apply.)

- Asthma  Eczema
- Hayfever  Anaphylaxis
- Other:

**14. Currently taking oral contraceptives?**

- 
- Yes
- 
- No

**15. Smoking Status:**

- 
- Current Smoker
- 
- Former Smoker
- 
- Never Smoked
- 
- No Data

**16. Has the patient been on any of the following in the last four weeks?**  
(Check all that apply.)

- Diuretics  Antibiotics
- NSAIDs (excluding aspirin)  ACEi/ARBs
- Aprotinin  Recreational Drugs

**17. Has the patient undergone any procedures requiring radio contrast in the last four weeks?**

- 
- Yes
- 
- No

**If Yes, enter the date of last procedure:** /  /  (mm/dd/yyyy)**18. Was the patient given any blood products in the last four weeks?**

- 
- Yes
- 
- No

**If Yes, enter the date of last occurrence:** /  /  (mm/dd/yyyy)**19. Has the patient undergone any of the following in the last four weeks?**  
(Check all that apply.)

- Cardiac Surgery  Nephrotoxic Insult
- Cardiac Catheterization  Vascular Surgery
- Other Major Surgery/Trauma

DR1 - CRF 04

Patient ID:

|  |  |  |  |  |  |
|--|--|--|--|--|--|
|  |  |  |  |  |  |
|--|--|--|--|--|--|

Coordinator ID:

|  |  |  |  |  |  |
|--|--|--|--|--|--|
|  |  |  |  |  |  |
|--|--|--|--|--|--|

Form ID:

|  |  |  |  |  |  |   |  |  |  |  |  |  |
|--|--|--|--|--|--|---|--|--|--|--|--|--|
|  |  |  |  |  |  | - |  |  |  |  |  |  |
|--|--|--|--|--|--|---|--|--|--|--|--|--|

1. Date: 

|  |  |
|--|--|
|  |  |
|--|--|

 / 

|  |  |
|--|--|
|  |  |
|--|--|

 / 

|  |  |  |  |
|--|--|--|--|
|  |  |  |  |
|--|--|--|--|

 (mm/dd/yyyy)2. Time: 

|  |  |
|--|--|
|  |  |
|--|--|

 : 

|  |  |
|--|--|
|  |  |
|--|--|

 (24-hour clock)

## 3. Edema:

 Generalized   
 Peripheral Only   
 Localized Only (sacral/flank)   
 None   
 Not Recorded

## 4. Lung rales:

 Present   
 Absent   
 Not Recorded

## 5. Heart:

 Raised JVD   
 Cardiac Murmurs   
 Arrhythmias   
 No Abnormalities   
 Not Recorded

## 6. Ascites:

 Yes   
 No   
 Not Recorded

## 7. Jaundice:

 Yes   
 No   
 Not Recorded

## 8. Foley Catheter:

 Yes   
 No   
 Not Recorded

## 9. Fluid overload noted from chest X-ray:

 Yes   
 No   
 X-Ray Not Done   
 Inconclusive

## 10. Surgical status:

 Emergency   
 Elective   
 None   
 Not Recorded

## 11. Source of infection?

 Known   
 Suspected   
 None   
 Not Recorded

## 12. If infectious source known or suspected, check all that apply:

|                                        |                                |                                   |
|----------------------------------------|--------------------------------|-----------------------------------|
| <input type="checkbox"/> Urinary Tract | <input type="checkbox"/> Lung  | <input type="checkbox"/> GI Tract |
| <input type="checkbox"/> Blood         | <input type="checkbox"/> CSF   | <input type="checkbox"/> Skin     |
| <input type="checkbox"/> Joint         | <input type="checkbox"/> Other |                                   |

## 13. Cultures done?

 Yes   
 No

Genomics of Drug Induced Renal Injury (DIRI): Risk Factors

DR1 - CRF 05 Patient ID: [ ] [ ] [ ] [ ] [ ] [ ] Coordinator ID: [ ] [ ] [ ] [ ] [ ] [ ] Form ID: [ ] [ ] [ ] [ ] [ ] [ ] - [ ] [ ] [ ] [ ] [ ] [ ]

1. Date: [ ] [ ] / [ ] [ ] / [ ] [ ] [ ] [ ] (mm/dd/yyyy)

2. Time: [ ] [ ] : [ ] [ ] (24-hour clock)

3. Did patient have any of the following risk factors for AKI in the last 72 hours or since the last time point? Yes No

If Yes, please answer in detail to each of the following seven risk categories:

a. Procedures requiring intravascular contrast agents: Yes No

If Yes, please check all that apply in the following and for each checked item please also provide the date/time of the procedure and the amount of contrast agents:

01-01 CONTRAST - INTRAVENOUS Date: [ ] [ ] / [ ] [ ] / [ ] [ ] [ ] [ ] Time: [ ] [ ] : [ ] [ ] Amount: [ ] [ ] ml NA

01-02 CONTRAST - CARDIAC CATH Date: [ ] [ ] / [ ] [ ] / [ ] [ ] [ ] [ ] Time: [ ] [ ] : [ ] [ ] Amount: [ ] [ ] ml NA

01-03 CONTRAST - INTRAARTERIAL Date: [ ] [ ] / [ ] [ ] / [ ] [ ] [ ] [ ] Time: [ ] [ ] : [ ] [ ] Amount: [ ] [ ] ml NA

b. Nephrotoxic agents: Yes No

If Yes, please check all that apply in the following:

- 02-01 TRANSPLANT MEDS
02-02 NON-PRESCRIPTION MEDS
02-03 CHEMOTHERAPY
02-04 IV DRUG ABUSE
02-05 AMINOGLYCOSIDES
02-06 ANTIBIOTICS OTHER THAN AMINOGLYCOSIDES
02-07 NSAIDS (EXCLUDING ASPIRIN)
02-08 RHABDOMYOLYSIS
02-09 IV HEMOLYSIS
02-10 ANESTHETIC AGENTS
02-11 ACEI/ARBs
02-12 OTHER PRESCRIPTION MEDS

c. Surgical procedures requiring general anesthesia: Yes No

If Yes, please check all that apply in the following:

- CARDIAC SURGERY
03-01 CABG ALONE
03-02 VALVE ALONE
03-03 COMBINED CABG & VALVE
03-04 OTHER

- VASCULAR CAUSES
04-01 DISSECTING ANEURYSMS
04-02 ANEURYSM REPAIR
04-04 VASCULAR (UNSPECIFIED)
04-05 VASCULAR SURGERY - CAROTID

- 04-06 VASCULAR SURGERY - PERIPHERAL VASCULAR DISEASE

- OTHER SURGERY
05-01 SOLID ORGAN TRANSPLANT
05-03 OTHER

d. MAP < 65 mmHg for more than 60 minutes if monitored, or SBP < 90 mmHg if not monitored:

Yes No

e. Additional risk factors for AKI: Yes No

If Yes, please check all that apply in the following:

- INTRAVASCULAR FLUID LOSS
06-01 HEMORRHAGE
06-02 DIC
06-03 BURNS
06-04 HYPOVOLEMIA
06-05 HYPOALB (< 3 g/dL or 30 g/L)

- INCREASED VASCULAR CAPACITY
07-01 SEPSIS
07-02 ANAPHYLACTIC REACTIONS
07-03 LOSS OF SYMPATHETIC TONE
07-04 LOSS OF AUTOREGULATION
07-05 ANESTHESIA
07-06 HYPOTENSION FROM OTHER CAUSES; MAP < 65

- CARDIAC FAILURE
08-01 MI
08-02 CHF
08-03 PUL EMBOLUS
08-04 VALVE FAILURE
08-05 CARDIOGENIC SHOCK
08-06 ARRHYTHMIA
08-07 TAMPONADE

--- Continued from risk category e ---

- LIVER DISEASES
09-01 HEPATORENAL SYNDROME
09-02 HYPOALB (< 3 g/dL or 30 g/L)
09-03 CIRRHOSIS
09-04 HEPATITIS
09-05 HEPATIC DISEASE (UNSPECIFIED)

- ECF LOSSES
10-01 VOMITING
10-02 DIARRHEA
10-03 DIABETES INSIPIDUS
10-04 ADRENAL INSUFFICIENCY
10-05 DEHYDRATION

- OTHER PROCEDURES
11-01 SWAN GANZ PLACEMENT
11-02 CARDIAC PROCEDURES
11-03 ECMO/ECOR
11-04 CHEST TUBE PLACEMENT
11-05 BRONCHOSCOPY
11-06 THORACENTESIS
11-07 PARACENTESIS
11-08 BURN PROCEDURES
11-09 RADIOLOGIC PROCEDURES
11-10 HYPERBARIC TREATMENTS
11-11 INTERNAL ORGAN BIOPSY
11-12 PLASMAPHERESIS
11-13 TIPS
11-14 EGD/COLONOSCOPY
11-15 LP/ICP MONITORING
11-16 LVAD
11-17 PLACEMENT OF PACEMAKER

f. RBC transfusion: Yes No

g. Hyperglycemia: (blood sugar >110mg/dL or 6.05 mmol/L, or patient is on insulin.)

Yes No



**Genomics of Drug Induced Renal Injury (DIRI): Vitals, Labs, I&O**

**Patient ID:**

**Coordinator ID:**

**Form ID:**

-

**DIRI - CRF 06**

1. Date:  /  /  (mm/dd/yyyy)

2. Time:  :  (24-hour clock)

3. Was patient in ICU on this day?  Yes  No

**Note:** The date and time of entry will be the actual time documented for the BUN and Creatinine results from the lab reports in the patient's medical records. All other lab values may be collected for up to a window of +/- 4 hours from the time of the BUN/Creatinine collection.

**NA = Data Not Available/Unknown:** This Box must be marked for missing values.

**Vital Signs**

**NA**

4. Temperature:  .   F  C

5. Systolic BP:  mmHg

6. Diastolic BP:  mmHg

7. Heart Rate:  bpm

8. Respiratory Rate:  bpm

9. Weight:  .  kg

**Vital Signs (For ICU patients only)**

**NA**

10. FIO2:  .   Frac  L/min

11. CVP:  mmHg

12. PAWP:  mmHg

13. Cardiac Output:  .  L/min

14. O2 Apparatus:

- Vent  Mask  Cannula  Trach Collar
- CPAP  None  Other

15. pH:  .

16. paO2:  mmHg

17. paCO2:  mmHg

18. Neurological State - Eye:

19. Neurological State - Verbal:

20. Neurological State - Motor:

**Labs**

**NA**

21. Na:  mEq/L (mmol/L)

22. K:  .  mEq/L (mmol/L)

23. Cl:  mEq/L (mmol/L)

24. HCO3:  .  mEq/L (mmol/L)

25. BUN:  .   mg/dL  mmol/L

26. Creatinine:  .   mg/dL  umol/L

27. Glucose:  .   mg/dL  mmol/L

28. Total Ca:  .   mg/dL  mmol/L

29. Ionized Ca:  .   mg/dL  mmol/L

30. PO4:  .   mg/dL  mmol/L

31. Mg:  .   mg/dL  mmol/L

32. Albumin:  .   g/dL  g/L

33. Total Bilirubin:  .   mg/dL  umol/L

34. Direct Bilirubin:  .   mg/dL  umol/L

**Labs (--- continued ---)**

**NA**

35. ALT (SGPT):  IU/L

36. AST (SGOT):  IU/L

37. ALP:  IU/L

38. WBC:  .   $10^3/mm^3$  ( $10^9/L$ )

39. Bands:  .  %

40. Eosinophils:  .  %

41. Hemoglobin:  .   g/dL  g/L

42. HCT:  .  %

43. Platelets:   $10^3/mm^3$  ( $10^9/L$ )

44. PT:  .  second

45. PTT:  .  second

46. INR:  .

47. Lactate Level:  .   mg/dL  mmol/L

**Patient ID:**  

|  |  |  |  |  |  |
|--|--|--|--|--|--|
|  |  |  |  |  |  |
|--|--|--|--|--|--|

**Form ID:**  

|  |  |  |  |  |  |
|--|--|--|--|--|--|
|  |  |  |  |  |  |
|--|--|--|--|--|--|

 - 
 

|  |  |  |  |  |  |
|--|--|--|--|--|--|
|  |  |  |  |  |  |
|--|--|--|--|--|--|

DR1 - CRF 06

**Intake & Output**

48. Was patient on dialysis today (includes days between intermittent dialysis)?

- Yes    No    No Data

49. Was I&O collection done for the day?

- Yes    No

If no I&O collection, please state reason:

|  |
|--|
|  |
|--|

50. I&O Collection Times:

Start Date/Time: 

|  |  |
|--|--|
|  |  |
|--|--|

 / 

|  |  |
|--|--|
|  |  |
|--|--|

 / 

|  |  |  |  |
|--|--|--|--|
|  |  |  |  |
|--|--|--|--|

 (mm/dd/yyyy)    

|  |  |
|--|--|
|  |  |
|--|--|

 : 

|  |  |
|--|--|
|  |  |
|--|--|

 (24-hr clock)

Stop Date/Time: 

|  |  |
|--|--|
|  |  |
|--|--|

 / 

|  |  |
|--|--|
|  |  |
|--|--|

 / 

|  |  |  |  |
|--|--|--|--|
|  |  |  |  |
|--|--|--|--|

 (mm/dd/yyyy)    

|  |  |
|--|--|
|  |  |
|--|--|

 : 

|  |  |
|--|--|
|  |  |
|--|--|

 (24-hr clock)

| Intake                                                                                                                                                                                                                                                                                                                                                                                                                                                                                                                                                                                                                                                                                                                                                                                                                                                                                                                                                                                                                                                                                                                                                                                                                                                                                                                                                                                                                                                                                                                                                                                                                                                                                                          | Output |  |  |  |  |  |  |  |  |  |  |  |  |  |  |  |  |  |  |  |                                                                                                                                                                                                                                                                                                                                                                                                                                                                                                                                                                                                                                                                                                                                                                                                                                                                                                                                                                                                                                                                                                                                                                                                                                                                                                                                                                                                                                                                                                                                                                                                                                                                                                                                                                                                                                                                                                                                                                                                                                                            |  |  |  |  |  |  |  |  |  |  |  |  |  |  |  |  |  |  |  |  |  |  |  |  |
|-----------------------------------------------------------------------------------------------------------------------------------------------------------------------------------------------------------------------------------------------------------------------------------------------------------------------------------------------------------------------------------------------------------------------------------------------------------------------------------------------------------------------------------------------------------------------------------------------------------------------------------------------------------------------------------------------------------------------------------------------------------------------------------------------------------------------------------------------------------------------------------------------------------------------------------------------------------------------------------------------------------------------------------------------------------------------------------------------------------------------------------------------------------------------------------------------------------------------------------------------------------------------------------------------------------------------------------------------------------------------------------------------------------------------------------------------------------------------------------------------------------------------------------------------------------------------------------------------------------------------------------------------------------------------------------------------------------------|--------|--|--|--|--|--|--|--|--|--|--|--|--|--|--|--|--|--|--|--|------------------------------------------------------------------------------------------------------------------------------------------------------------------------------------------------------------------------------------------------------------------------------------------------------------------------------------------------------------------------------------------------------------------------------------------------------------------------------------------------------------------------------------------------------------------------------------------------------------------------------------------------------------------------------------------------------------------------------------------------------------------------------------------------------------------------------------------------------------------------------------------------------------------------------------------------------------------------------------------------------------------------------------------------------------------------------------------------------------------------------------------------------------------------------------------------------------------------------------------------------------------------------------------------------------------------------------------------------------------------------------------------------------------------------------------------------------------------------------------------------------------------------------------------------------------------------------------------------------------------------------------------------------------------------------------------------------------------------------------------------------------------------------------------------------------------------------------------------------------------------------------------------------------------------------------------------------------------------------------------------------------------------------------------------------|--|--|--|--|--|--|--|--|--|--|--|--|--|--|--|--|--|--|--|--|--|--|--|--|
| <p>51. PO: <table border="1" style="display: inline-table; border-collapse: collapse;"> <tr> <td style="width: 20px; height: 20px;"></td> </tr> </table> ml    <u>NA</u>    <input type="checkbox"/></p> <p>52. NG: <table border="1" style="display: inline-table; border-collapse: collapse;"> <tr> <td style="width: 20px; height: 20px;"></td> </tr> </table> ml    <input type="checkbox"/></p> <p>53. IV: <table border="1" style="display: inline-table; border-collapse: collapse;"> <tr> <td style="width: 20px; height: 20px;"></td> </tr> </table> ml    <input type="checkbox"/></p> <p>54. Other Intake: <table border="1" style="display: inline-table; border-collapse: collapse;"> <tr> <td style="width: 20px; height: 20px;"></td> </tr> </table> ml    <input type="checkbox"/></p> <p>55. Total Intake: <table border="1" style="display: inline-table; border-collapse: collapse;"> <tr> <td style="width: 20px; height: 20px;"></td> </tr> </table> ml    <input type="checkbox"/></p> |        |  |  |  |  |  |  |  |  |  |  |  |  |  |  |  |  |  |  |  | <p>56. Urine: <table border="1" style="display: inline-table; border-collapse: collapse;"> <tr> <td style="width: 20px; height: 20px;"></td> </tr> </table> ml    <input type="checkbox"/></p> <p>57. Stool: <table border="1" style="display: inline-table; border-collapse: collapse;"> <tr> <td style="width: 20px; height: 20px;"></td> </tr> </table> ml    <input type="checkbox"/></p> <p>58. NG: <table border="1" style="display: inline-table; border-collapse: collapse;"> <tr> <td style="width: 20px; height: 20px;"></td> </tr> </table> ml    <input type="checkbox"/></p> <p>59. Wounds&amp;Drains: <table border="1" style="display: inline-table; border-collapse: collapse;"> <tr> <td style="width: 20px; height: 20px;"></td> </tr> </table> ml    <input type="checkbox"/></p> <p>60. Other Output: <table border="1" style="display: inline-table; border-collapse: collapse;"> <tr> <td style="width: 20px; height: 20px;"></td> </tr> </table> ml    <input type="checkbox"/></p> <p>61. Total Output: <table border="1" style="display: inline-table; border-collapse: collapse;"> <tr> <td style="width: 20px; height: 20px;"></td> </tr> </table> ml    <input type="checkbox"/></p> |  |  |  |  |  |  |  |  |  |  |  |  |  |  |  |  |  |  |  |  |  |  |  |  |
|                                                                                                                                                                                                                                                                                                                                                                                                                                                                                                                                                                                                                                                                                                                                                                                                                                                                                                                                                                                                                                                                                                                                                                                                                                                                                                                                                                                                                                                                                                                                                                                                                                                                                                                 |        |  |  |  |  |  |  |  |  |  |  |  |  |  |  |  |  |  |  |  |                                                                                                                                                                                                                                                                                                                                                                                                                                                                                                                                                                                                                                                                                                                                                                                                                                                                                                                                                                                                                                                                                                                                                                                                                                                                                                                                                                                                                                                                                                                                                                                                                                                                                                                                                                                                                                                                                                                                                                                                                                                            |  |  |  |  |  |  |  |  |  |  |  |  |  |  |  |  |  |  |  |  |  |  |  |  |
|                                                                                                                                                                                                                                                                                                                                                                                                                                                                                                                                                                                                                                                                                                                                                                                                                                                                                                                                                                                                                                                                                                                                                                                                                                                                                                                                                                                                                                                                                                                                                                                                                                                                                                                 |        |  |  |  |  |  |  |  |  |  |  |  |  |  |  |  |  |  |  |  |                                                                                                                                                                                                                                                                                                                                                                                                                                                                                                                                                                                                                                                                                                                                                                                                                                                                                                                                                                                                                                                                                                                                                                                                                                                                                                                                                                                                                                                                                                                                                                                                                                                                                                                                                                                                                                                                                                                                                                                                                                                            |  |  |  |  |  |  |  |  |  |  |  |  |  |  |  |  |  |  |  |  |  |  |  |  |
|                                                                                                                                                                                                                                                                                                                                                                                                                                                                                                                                                                                                                                                                                                                                                                                                                                                                                                                                                                                                                                                                                                                                                                                                                                                                                                                                                                                                                                                                                                                                                                                                                                                                                                                 |        |  |  |  |  |  |  |  |  |  |  |  |  |  |  |  |  |  |  |  |                                                                                                                                                                                                                                                                                                                                                                                                                                                                                                                                                                                                                                                                                                                                                                                                                                                                                                                                                                                                                                                                                                                                                                                                                                                                                                                                                                                                                                                                                                                                                                                                                                                                                                                                                                                                                                                                                                                                                                                                                                                            |  |  |  |  |  |  |  |  |  |  |  |  |  |  |  |  |  |  |  |  |  |  |  |  |
|                                                                                                                                                                                                                                                                                                                                                                                                                                                                                                                                                                                                                                                                                                                                                                                                                                                                                                                                                                                                                                                                                                                                                                                                                                                                                                                                                                                                                                                                                                                                                                                                                                                                                                                 |        |  |  |  |  |  |  |  |  |  |  |  |  |  |  |  |  |  |  |  |                                                                                                                                                                                                                                                                                                                                                                                                                                                                                                                                                                                                                                                                                                                                                                                                                                                                                                                                                                                                                                                                                                                                                                                                                                                                                                                                                                                                                                                                                                                                                                                                                                                                                                                                                                                                                                                                                                                                                                                                                                                            |  |  |  |  |  |  |  |  |  |  |  |  |  |  |  |  |  |  |  |  |  |  |  |  |
|                                                                                                                                                                                                                                                                                                                                                                                                                                                                                                                                                                                                                                                                                                                                                                                                                                                                                                                                                                                                                                                                                                                                                                                                                                                                                                                                                                                                                                                                                                                                                                                                                                                                                                                 |        |  |  |  |  |  |  |  |  |  |  |  |  |  |  |  |  |  |  |  |                                                                                                                                                                                                                                                                                                                                                                                                                                                                                                                                                                                                                                                                                                                                                                                                                                                                                                                                                                                                                                                                                                                                                                                                                                                                                                                                                                                                                                                                                                                                                                                                                                                                                                                                                                                                                                                                                                                                                                                                                                                            |  |  |  |  |  |  |  |  |  |  |  |  |  |  |  |  |  |  |  |  |  |  |  |  |
|                                                                                                                                                                                                                                                                                                                                                                                                                                                                                                                                                                                                                                                                                                                                                                                                                                                                                                                                                                                                                                                                                                                                                                                                                                                                                                                                                                                                                                                                                                                                                                                                                                                                                                                 |        |  |  |  |  |  |  |  |  |  |  |  |  |  |  |  |  |  |  |  |                                                                                                                                                                                                                                                                                                                                                                                                                                                                                                                                                                                                                                                                                                                                                                                                                                                                                                                                                                                                                                                                                                                                                                                                                                                                                                                                                                                                                                                                                                                                                                                                                                                                                                                                                                                                                                                                                                                                                                                                                                                            |  |  |  |  |  |  |  |  |  |  |  |  |  |  |  |  |  |  |  |  |  |  |  |  |
|                                                                                                                                                                                                                                                                                                                                                                                                                                                                                                                                                                                                                                                                                                                                                                                                                                                                                                                                                                                                                                                                                                                                                                                                                                                                                                                                                                                                                                                                                                                                                                                                                                                                                                                 |        |  |  |  |  |  |  |  |  |  |  |  |  |  |  |  |  |  |  |  |                                                                                                                                                                                                                                                                                                                                                                                                                                                                                                                                                                                                                                                                                                                                                                                                                                                                                                                                                                                                                                                                                                                                                                                                                                                                                                                                                                                                                                                                                                                                                                                                                                                                                                                                                                                                                                                                                                                                                                                                                                                            |  |  |  |  |  |  |  |  |  |  |  |  |  |  |  |  |  |  |  |  |  |  |  |  |
|                                                                                                                                                                                                                                                                                                                                                                                                                                                                                                                                                                                                                                                                                                                                                                                                                                                                                                                                                                                                                                                                                                                                                                                                                                                                                                                                                                                                                                                                                                                                                                                                                                                                                                                 |        |  |  |  |  |  |  |  |  |  |  |  |  |  |  |  |  |  |  |  |                                                                                                                                                                                                                                                                                                                                                                                                                                                                                                                                                                                                                                                                                                                                                                                                                                                                                                                                                                                                                                                                                                                                                                                                                                                                                                                                                                                                                                                                                                                                                                                                                                                                                                                                                                                                                                                                                                                                                                                                                                                            |  |  |  |  |  |  |  |  |  |  |  |  |  |  |  |  |  |  |  |  |  |  |  |  |
|                                                                                                                                                                                                                                                                                                                                                                                                                                                                                                                                                                                                                                                                                                                                                                                                                                                                                                                                                                                                                                                                                                                                                                                                                                                                                                                                                                                                                                                                                                                                                                                                                                                                                                                 |        |  |  |  |  |  |  |  |  |  |  |  |  |  |  |  |  |  |  |  |                                                                                                                                                                                                                                                                                                                                                                                                                                                                                                                                                                                                                                                                                                                                                                                                                                                                                                                                                                                                                                                                                                                                                                                                                                                                                                                                                                                                                                                                                                                                                                                                                                                                                                                                                                                                                                                                                                                                                                                                                                                            |  |  |  |  |  |  |  |  |  |  |  |  |  |  |  |  |  |  |  |  |  |  |  |  |
|                                                                                                                                                                                                                                                                                                                                                                                                                                                                                                                                                                                                                                                                                                                                                                                                                                                                                                                                                                                                                                                                                                                                                                                                                                                                                                                                                                                                                                                                                                                                                                                                                                                                                                                 |        |  |  |  |  |  |  |  |  |  |  |  |  |  |  |  |  |  |  |  |                                                                                                                                                                                                                                                                                                                                                                                                                                                                                                                                                                                                                                                                                                                                                                                                                                                                                                                                                                                                                                                                                                                                                                                                                                                                                                                                                                                                                                                                                                                                                                                                                                                                                                                                                                                                                                                                                                                                                                                                                                                            |  |  |  |  |  |  |  |  |  |  |  |  |  |  |  |  |  |  |  |  |  |  |  |  |
|                                                                                                                                                                                                                                                                                                                                                                                                                                                                                                                                                                                                                                                                                                                                                                                                                                                                                                                                                                                                                                                                                                                                                                                                                                                                                                                                                                                                                                                                                                                                                                                                                                                                                                                 |        |  |  |  |  |  |  |  |  |  |  |  |  |  |  |  |  |  |  |  |                                                                                                                                                                                                                                                                                                                                                                                                                                                                                                                                                                                                                                                                                                                                                                                                                                                                                                                                                                                                                                                                                                                                                                                                                                                                                                                                                                                                                                                                                                                                                                                                                                                                                                                                                                                                                                                                                                                                                                                                                                                            |  |  |  |  |  |  |  |  |  |  |  |  |  |  |  |  |  |  |  |  |  |  |  |  |

**Patient ID:**

**Coordinator ID:**

**Form ID:**  
      -

DIRI - CRF 07

1. Urinalysis done?  Yes  No  
 If Yes, please enter data in the Urinalysis section.
2. Urine chemistry done?  Yes  No  
 If Yes, please enter data in the Urine Chemistry section.

**Urinalysis**

3. Date:   /   /     (mm/dd/yyyy)
4. Time:   :   (24hr clock)
5. Specific Gravity:  .     NA
6. pH:  .    NA
7. Protein:  Negative  Trace  1+  2+  3+  4+  NA
8. Glucose:  Negative  Trace  1+  2+  3+  4+  NA
9. WBC:  Rare  0-2  3-5  6-10  11-20  21-50  >50  NA
10. RBC:  Rare  0-2  3-5  6-10  11-20  21-50  >50  NA
11. Urinary Sediments: (check all that apply)
- |                                        |                                        |                                             |
|----------------------------------------|----------------------------------------|---------------------------------------------|
| <input type="checkbox"/> Hyaline Cast  | <input type="checkbox"/> Granular Cast | <input type="checkbox"/> RBC Cast           |
| <input type="checkbox"/> Cellular Cast | <input type="checkbox"/> WBC Cast      | <input type="checkbox"/> Hgb Cast           |
| <input type="checkbox"/> Fatty Cast    | <input type="checkbox"/> Waxy Cast     | <input type="checkbox"/> Tubular Broad Cast |
12. Eosinophils:  Present  Absent  No Data

**Urine Chemistry**

13. Type of Urine Collection:  Timed  Spot **Note:** (1) For **Timed** collection, enter both the Start and Stop Dates/Times.  
 (2) For **Spot** collection, enter only the Start date/time.
14. Urine Collect Start Date/Time:   /   /     (mm/dd/yyyy)   :   (24-hour clock)
15. Urine Collect Stop Date/Time:   /   /     (mm/dd/yyyy)   :   (24-hour clock)
16. Urine Total:     ml  NA
17. Na:    mEq/L (mmol/L)  NA
18. K:    mEq/L (mmol/L)  NA
19. Cl:    mEq/L (mmol/L)  NA
20. Ca:    .    mg/dL  NA  
 mmol/L
21. PO4:    .    mg/dL  NA  
 mmol/L
22. Urea Nitrogen:    .    mg/dL  NA  
 mmol/L
23. Protein:      mg/dL  NA  
 mg/L
24. Creatinine:     .   mg/dL  NA  
 umol/L
25. Osmolality:     mOsm/L  NA
26. Albumin:    .   mg/dL  NA  
 mg/L

Patient ID:

|  |  |  |  |  |  |
|--|--|--|--|--|--|
|  |  |  |  |  |  |
|--|--|--|--|--|--|

Coordinator ID:

|  |  |  |  |  |  |
|--|--|--|--|--|--|
|  |  |  |  |  |  |
|--|--|--|--|--|--|

Form ID:

|  |  |  |  |  |  |   |  |  |  |  |  |  |
|--|--|--|--|--|--|---|--|--|--|--|--|--|
|  |  |  |  |  |  | - |  |  |  |  |  |  |
|--|--|--|--|--|--|---|--|--|--|--|--|--|

DR1 - CRF 08

**1. Has the patient received RRT in the last 72 hours or since the last time point if less than 72 hours?**

Yes    No

**2. Reasons to start/pursue RRT:** (Check all that apply)

- 01-01 Hyperkalemia  
 01-02 Acidemia  
 01-03 Electrolyte Disturbance  
 01-04 Progressive Azotemia  
 01-05 Uremic Manifestations  
 01-06 Oliguria (<400 ml/24h)  
 01-07 Fluid Overload  
 01-08 Volume Status Unable to Accomodate Demands for Fluid  
 01-09 Compromised Cardiac, Respiratory or Liver Status  
 01-10 Intoxication  
 01-11 Non-recovery of Renal Function  
 01-12 Other

**3. Type of RRT procedure:**

- IHD    CVVH    CVVHD    CVVHDF  
 SLED    UF Only    PD

**4. RRT Start Date/Time:**

|  |  |  |   |  |  |  |   |  |  |  |  |  |              |
|--|--|--|---|--|--|--|---|--|--|--|--|--|--------------|
|  |  |  | / |  |  |  | / |  |  |  |  |  | (mm/dd/yyyy) |
|--|--|--|---|--|--|--|---|--|--|--|--|--|--------------|

|  |  |   |  |  |              |
|--|--|---|--|--|--------------|
|  |  | : |  |  | (24hr clock) |
|--|--|---|--|--|--------------|

**5. Was CRRT temporarily stopped in the last 72 hours or since the last time point if less than 72 hours?**

Yes    No

If Yes, answer the following questions:

**a. RRT Stop Date/Time:**

|  |  |  |   |  |  |  |   |  |  |  |  |  |              |
|--|--|--|---|--|--|--|---|--|--|--|--|--|--------------|
|  |  |  | / |  |  |  | / |  |  |  |  |  | (mm/dd/yyyy) |
|--|--|--|---|--|--|--|---|--|--|--|--|--|--------------|

|  |  |   |  |  |              |
|--|--|---|--|--|--------------|
|  |  | : |  |  | (24hr clock) |
|--|--|---|--|--|--------------|

**6. Was RRT definitely stopped in the last 72 hours or since the last time point if less than 72 hours?**

Yes    No

If Yes, answer the following questions:

**a. RRT Stop Date/Time:**

|  |  |  |   |  |  |  |   |  |  |  |  |  |              |
|--|--|--|---|--|--|--|---|--|--|--|--|--|--------------|
|  |  |  | / |  |  |  | / |  |  |  |  |  | (mm/dd/yyyy) |
|--|--|--|---|--|--|--|---|--|--|--|--|--|--------------|

|  |  |   |  |  |              |
|--|--|---|--|--|--------------|
|  |  | : |  |  | (24hr clock) |
|--|--|---|--|--|--------------|

**b. Reasons for RRT discontinuation:** (Check all that apply)

- 03-01 Renal recovery  
 03-02 Death  
 03-03 Withdrawal of treatment  
 03-04 Other

**Genomics of Drug Induced Renal Injury (DIRI): Drug Dosing**

**Patient ID:**

**Coordinator ID:**

**Form ID:**       -

DIRI - CRF 09

**1. Information about this drug as recorded in screening log:**

**a. Drug ID:**

**b. Drug Full Name:**

**c. Drug Trade Name:**

**d. Start Date/Time:**   /   /     (mm/dd/yyyy)  :  (24hr clock)

**e. Dose Reduction or Drug Stop Date/Time:**   /   /     (mm/dd/yyyy)  :  (24hr clock)  NA

**2. Is serum drug concentration available?**  Yes  No

**3. Has the patient previously received this drug (in any dose or route) during a previous hospital admission or as part of previous outpatient treatment?**

Yes  No  Unknown

**If Yes, please answer the following questions:**

**a. Did the patient experience adverse events related to kidney injury?**

Yes  No  Unknown  NA

**b. Did the patient recover and kidney related AE resolve?**

Yes  No  Unknown  NA

**Drug Dose History (in chronological order)**

**4. Episode 1**

**a. Start:**   /   /     (mm/dd/yyyy)  
 :  (24hr clock)

**b. End:**   /   /     (mm/dd/yyyy)  
 :  (24hr clock)

**c. Dose:**     .    mg  gram  mcg  
 Other : \_\_\_\_\_

**d. Freq:**  .  hr

**e. Route:**  PO  IM  IV  SQ  PR  
 Other : \_\_\_\_\_

**f. Concentration:**   .   mcg/mL  
 Other : \_\_\_\_\_

**Date :**   /   /     (mm/dd/yyyy)

**Time :**  :  (24hr clock)

**g. Trough Conc:**  Yes  No  Unknown

**5. Episode 2**

**a. Start:**   /   /     (mm/dd/yyyy)  
 :  (24hr clock)

**b. End:**   /   /     (mm/dd/yyyy)  
 :  (24hr clock)

**c. Dose:**     .    mg  gram  mcg  
 Other : \_\_\_\_\_

**d. Freq:**  .  hr

**e. Route:**  PO  IM  IV  SQ  PR  
 Other : \_\_\_\_\_

**f. Concentration:**   .   mcg/mL  
 Other : \_\_\_\_\_

**Date :**   /   /     (mm/dd/yyyy)

**Time :**  :  (24hr clock)

**g. Trough Conc:**  Yes  No  Unknown

**6. Episode 3**

**a. Start:**   /   /     (mm/dd/yyyy)  
 :  (24hr clock)

**b. End:**   /   /     (mm/dd/yyyy)  
 :  (24hr clock)

**c. Dose:**     .    mg  gram  mcg  
 Other : \_\_\_\_\_

**d. Freq:**  .  hr

**e. Route:**  PO  IM  IV  SQ  PR  
 Other : \_\_\_\_\_

**f. Concentration:**   .   mcg/mL  
 Other : \_\_\_\_\_

**Date :**   /   /     (mm/dd/yyyy)

**Time :**  :  (24hr clock)

**g. Trough Conc:**  Yes  No  Unknown

DIRI - CRF 09

Patient ID:

|  |  |  |  |  |  |
|--|--|--|--|--|--|
|  |  |  |  |  |  |
|--|--|--|--|--|--|

Form ID:

|  |  |  |  |  |  |   |  |  |  |  |  |
|--|--|--|--|--|--|---|--|--|--|--|--|
|  |  |  |  |  |  | - |  |  |  |  |  |
|--|--|--|--|--|--|---|--|--|--|--|--|

**7. Episode 4**

a. Start: 

|  |  |
|--|--|
|  |  |
|--|--|

 / 

|  |  |
|--|--|
|  |  |
|--|--|

 / 

|  |  |  |  |  |  |
|--|--|--|--|--|--|
|  |  |  |  |  |  |
|--|--|--|--|--|--|

 (mm/dd/yyyy)  

|  |  |
|--|--|
|  |  |
|--|--|

 : 

|  |  |
|--|--|
|  |  |
|--|--|

 (24hr clock)

b. End: 

|  |  |
|--|--|
|  |  |
|--|--|

 / 

|  |  |
|--|--|
|  |  |
|--|--|

 / 

|  |  |  |  |  |  |
|--|--|--|--|--|--|
|  |  |  |  |  |  |
|--|--|--|--|--|--|

 (mm/dd/yyyy)  

|  |  |
|--|--|
|  |  |
|--|--|

 : 

|  |  |
|--|--|
|  |  |
|--|--|

 (24hr clock)

c. Dose: 

|  |  |  |  |  |  |
|--|--|--|--|--|--|
|  |  |  |  |  |  |
|--|--|--|--|--|--|

 . 

|  |  |
|--|--|
|  |  |
|--|--|

 mg  gram  mcg  
 Other : \_\_\_\_\_

d. Freq: 

|  |  |
|--|--|
|  |  |
|--|--|

 . 

|  |  |
|--|--|
|  |  |
|--|--|

 hr

e. Route:  PO  IM  IV  SQ  PR  
 Other : \_\_\_\_\_

f. Concentration: 

|  |  |
|--|--|
|  |  |
|--|--|

 . 

|  |  |
|--|--|
|  |  |
|--|--|

 mcg/mL  
 Other : \_\_\_\_\_

Date : 

|  |  |
|--|--|
|  |  |
|--|--|

 / 

|  |  |
|--|--|
|  |  |
|--|--|

 / 

|  |  |  |  |  |  |
|--|--|--|--|--|--|
|  |  |  |  |  |  |
|--|--|--|--|--|--|

 (mm/dd/yyyy)

Time : 

|  |  |
|--|--|
|  |  |
|--|--|

 : 

|  |  |
|--|--|
|  |  |
|--|--|

 (24hr clock)

g. Trough Conc:  Yes  No  Unknown

**8. Episode 5**

a. Start: 

|  |  |
|--|--|
|  |  |
|--|--|

 / 

|  |  |
|--|--|
|  |  |
|--|--|

 / 

|  |  |  |  |  |  |
|--|--|--|--|--|--|
|  |  |  |  |  |  |
|--|--|--|--|--|--|

 (mm/dd/yyyy)  

|  |  |
|--|--|
|  |  |
|--|--|

 : 

|  |  |
|--|--|
|  |  |
|--|--|

 (24hr clock)

b. End: 

|  |  |
|--|--|
|  |  |
|--|--|

 / 

|  |  |
|--|--|
|  |  |
|--|--|

 / 

|  |  |  |  |  |  |
|--|--|--|--|--|--|
|  |  |  |  |  |  |
|--|--|--|--|--|--|

 (mm/dd/yyyy)  

|  |  |
|--|--|
|  |  |
|--|--|

 : 

|  |  |
|--|--|
|  |  |
|--|--|

 (24hr clock)

c. Dose: 

|  |  |  |  |  |  |
|--|--|--|--|--|--|
|  |  |  |  |  |  |
|--|--|--|--|--|--|

 . 

|  |  |
|--|--|
|  |  |
|--|--|

 mg  gram  mcg  
 Other : \_\_\_\_\_

d. Freq: 

|  |  |
|--|--|
|  |  |
|--|--|

 . 

|  |  |
|--|--|
|  |  |
|--|--|

 hr

e. Route:  PO  IM  IV  SQ  PR  
 Other : \_\_\_\_\_

f. Concentration: 

|  |  |
|--|--|
|  |  |
|--|--|

 . 

|  |  |
|--|--|
|  |  |
|--|--|

 mcg/mL  
 Other : \_\_\_\_\_

Date : 

|  |  |
|--|--|
|  |  |
|--|--|

 / 

|  |  |
|--|--|
|  |  |
|--|--|

 / 

|  |  |  |  |  |  |
|--|--|--|--|--|--|
|  |  |  |  |  |  |
|--|--|--|--|--|--|

 (mm/dd/yyyy)

Time : 

|  |  |
|--|--|
|  |  |
|--|--|

 : 

|  |  |
|--|--|
|  |  |
|--|--|

 (24hr clock)

g. Trough Conc:  Yes  No  Unknown

**9. Episode 6**

a. Start: 

|  |  |
|--|--|
|  |  |
|--|--|

 / 

|  |  |
|--|--|
|  |  |
|--|--|

 / 

|  |  |  |  |  |  |
|--|--|--|--|--|--|
|  |  |  |  |  |  |
|--|--|--|--|--|--|

 (mm/dd/yyyy)  

|  |  |
|--|--|
|  |  |
|--|--|

 : 

|  |  |
|--|--|
|  |  |
|--|--|

 (24hr clock)

b. End: 

|  |  |
|--|--|
|  |  |
|--|--|

 / 

|  |  |
|--|--|
|  |  |
|--|--|

 / 

|  |  |  |  |  |  |
|--|--|--|--|--|--|
|  |  |  |  |  |  |
|--|--|--|--|--|--|

 (mm/dd/yyyy)  

|  |  |
|--|--|
|  |  |
|--|--|

 : 

|  |  |
|--|--|
|  |  |
|--|--|

 (24hr clock)

c. Dose: 

|  |  |  |  |  |  |
|--|--|--|--|--|--|
|  |  |  |  |  |  |
|--|--|--|--|--|--|

 . 

|  |  |
|--|--|
|  |  |
|--|--|

 mg  gram  mcg  
 Other : \_\_\_\_\_

d. Freq: 

|  |  |
|--|--|
|  |  |
|--|--|

 . 

|  |  |
|--|--|
|  |  |
|--|--|

 hr

e. Route:  PO  IM  IV  SQ  PR  
 Other : \_\_\_\_\_

f. Concentration: 

|  |  |
|--|--|
|  |  |
|--|--|

 . 

|  |  |
|--|--|
|  |  |
|--|--|

 mcg/mL  
 Other : \_\_\_\_\_

Date : 

|  |  |
|--|--|
|  |  |
|--|--|

 / 

|  |  |
|--|--|
|  |  |
|--|--|

 / 

|  |  |  |  |  |  |
|--|--|--|--|--|--|
|  |  |  |  |  |  |
|--|--|--|--|--|--|

 (mm/dd/yyyy)

Time : 

|  |  |
|--|--|
|  |  |
|--|--|

 : 

|  |  |
|--|--|
|  |  |
|--|--|

 (24hr clock)

g. Trough Conc:  Yes  No  Unknown

**10. Episode 7**

a. Start: 

|  |  |
|--|--|
|  |  |
|--|--|

 / 

|  |  |
|--|--|
|  |  |
|--|--|

 / 

|  |  |  |  |  |  |
|--|--|--|--|--|--|
|  |  |  |  |  |  |
|--|--|--|--|--|--|

 (mm/dd/yyyy)  

|  |  |
|--|--|
|  |  |
|--|--|

 : 

|  |  |
|--|--|
|  |  |
|--|--|

 (24hr clock)

b. End: 

|  |  |
|--|--|
|  |  |
|--|--|

 / 

|  |  |
|--|--|
|  |  |
|--|--|

 / 

|  |  |  |  |  |  |
|--|--|--|--|--|--|
|  |  |  |  |  |  |
|--|--|--|--|--|--|

 (mm/dd/yyyy)  

|  |  |
|--|--|
|  |  |
|--|--|

 : 

|  |  |
|--|--|
|  |  |
|--|--|

 (24hr clock)

c. Dose: 

|  |  |  |  |  |  |
|--|--|--|--|--|--|
|  |  |  |  |  |  |
|--|--|--|--|--|--|

 . 

|  |  |
|--|--|
|  |  |
|--|--|

 mg  gram  mcg  
 Other : \_\_\_\_\_

d. Freq: 

|  |  |
|--|--|
|  |  |
|--|--|

 . 

|  |  |
|--|--|
|  |  |
|--|--|

 hr

e. Route:  PO  IM  IV  SQ  PR  
 Other : \_\_\_\_\_

f. Concentration: 

|  |  |
|--|--|
|  |  |
|--|--|

 . 

|  |  |
|--|--|
|  |  |
|--|--|

 mcg/mL  
 Other : \_\_\_\_\_

Date : 

|  |  |
|--|--|
|  |  |
|--|--|

 / 

|  |  |
|--|--|
|  |  |
|--|--|

 / 

|  |  |  |  |  |  |
|--|--|--|--|--|--|
|  |  |  |  |  |  |
|--|--|--|--|--|--|

 (mm/dd/yyyy)

Time : 

|  |  |
|--|--|
|  |  |
|--|--|

 : 

|  |  |
|--|--|
|  |  |
|--|--|

 (24hr clock)

g. Trough Conc:  Yes  No  Unknown

**11. Episode 8**

a. Start: 

|  |  |
|--|--|
|  |  |
|--|--|

 / 

|  |  |
|--|--|
|  |  |
|--|--|

 / 

|  |  |  |  |  |  |
|--|--|--|--|--|--|
|  |  |  |  |  |  |
|--|--|--|--|--|--|

 (mm/dd/yyyy)  

|  |  |
|--|--|
|  |  |
|--|--|

 : 

|  |  |
|--|--|
|  |  |
|--|--|

 (24hr clock)

b. End: 

|  |  |
|--|--|
|  |  |
|--|--|

 / 

|  |  |
|--|--|
|  |  |
|--|--|

 / 

|  |  |  |  |  |  |
|--|--|--|--|--|--|
|  |  |  |  |  |  |
|--|--|--|--|--|--|

 (mm/dd/yyyy)  

|  |  |
|--|--|
|  |  |
|--|--|

 : 

|  |  |
|--|--|
|  |  |
|--|--|

 (24hr clock)

c. Dose: 

|  |  |  |  |  |  |
|--|--|--|--|--|--|
|  |  |  |  |  |  |
|--|--|--|--|--|--|

 . 

|  |  |
|--|--|
|  |  |
|--|--|

 mg  gram  mcg  
 Other : \_\_\_\_\_

d. Freq: 

|  |  |
|--|--|
|  |  |
|--|--|

 . 

|  |  |
|--|--|
|  |  |
|--|--|

 hr

e. Route:  PO  IM  IV  SQ  PR  
 Other : \_\_\_\_\_

f. Concentration: 

|  |  |
|--|--|
|  |  |
|--|--|

 . 

|  |  |
|--|--|
|  |  |
|--|--|

 mcg/mL  
 Other : \_\_\_\_\_

Date : 

|  |  |
|--|--|
|  |  |
|--|--|

 / 

|  |  |
|--|--|
|  |  |
|--|--|

 / 

|  |  |  |  |  |  |
|--|--|--|--|--|--|
|  |  |  |  |  |  |
|--|--|--|--|--|--|

 (mm/dd/yyyy)

Time : 

|  |  |
|--|--|
|  |  |
|--|--|

 : 

|  |  |
|--|--|
|  |  |
|--|--|

 (24hr clock)

g. Trough Conc:  Yes  No  Unknown

DR1 - CRF 09

**Patient ID:**  

|  |  |  |  |  |  |
|--|--|--|--|--|--|
|  |  |  |  |  |  |
|--|--|--|--|--|--|

**Form ID:**  

|  |  |  |  |  |  |
|--|--|--|--|--|--|
|  |  |  |  |  |  |
|--|--|--|--|--|--|

 - 

|  |  |  |  |  |  |
|--|--|--|--|--|--|
|  |  |  |  |  |  |
|--|--|--|--|--|--|

**12. Episode 9**

**a. Start:**

|  |  |
|--|--|
|  |  |
|--|--|

 / 

|  |  |
|--|--|
|  |  |
|--|--|

 / 

|  |  |  |  |  |  |
|--|--|--|--|--|--|
|  |  |  |  |  |  |
|--|--|--|--|--|--|

 (mm/dd/yyyy)  

|  |  |
|--|--|
|  |  |
|--|--|

 : 

|  |  |
|--|--|
|  |  |
|--|--|

 (24hr clock)

**b. End:**

|  |  |
|--|--|
|  |  |
|--|--|

 / 

|  |  |
|--|--|
|  |  |
|--|--|

 / 

|  |  |  |  |  |  |
|--|--|--|--|--|--|
|  |  |  |  |  |  |
|--|--|--|--|--|--|

 (mm/dd/yyyy)  

|  |  |
|--|--|
|  |  |
|--|--|

 : 

|  |  |
|--|--|
|  |  |
|--|--|

 (24hr clock)

**c. Dose:**

|  |  |  |  |  |
|--|--|--|--|--|
|  |  |  |  |  |
|--|--|--|--|--|

 . 

|  |  |
|--|--|
|  |  |
|--|--|

 mg  gram  mcg  
 Other : \_\_\_\_\_

**d. Freq:**

|  |  |
|--|--|
|  |  |
|--|--|

 . 

|  |  |
|--|--|
|  |  |
|--|--|

 hr

**e. Route:**  PO  IM  IV  SQ  PR  
 Other : \_\_\_\_\_

**f. Concentration:**

|  |  |
|--|--|
|  |  |
|--|--|

 . 

|  |  |
|--|--|
|  |  |
|--|--|

 mcg/mL  
 Other : \_\_\_\_\_

**Date :**

|  |  |
|--|--|
|  |  |
|--|--|

 / 

|  |  |
|--|--|
|  |  |
|--|--|

 / 

|  |  |  |  |
|--|--|--|--|
|  |  |  |  |
|--|--|--|--|

 (mm/dd/yyyy)

**Time :**

|  |  |
|--|--|
|  |  |
|--|--|

 : 

|  |  |
|--|--|
|  |  |
|--|--|

 (24hr clock)

**g. Trough Conc:**  Yes  No  Unknown

**13. Episode 10**

**a. Start:**

|  |  |
|--|--|
|  |  |
|--|--|

 / 

|  |  |
|--|--|
|  |  |
|--|--|

 / 

|  |  |  |  |  |  |
|--|--|--|--|--|--|
|  |  |  |  |  |  |
|--|--|--|--|--|--|

 (mm/dd/yyyy)  

|  |  |
|--|--|
|  |  |
|--|--|

 : 

|  |  |
|--|--|
|  |  |
|--|--|

 (24hr clock)

**b. End:**

|  |  |
|--|--|
|  |  |
|--|--|

 / 

|  |  |
|--|--|
|  |  |
|--|--|

 / 

|  |  |  |  |  |  |
|--|--|--|--|--|--|
|  |  |  |  |  |  |
|--|--|--|--|--|--|

 (mm/dd/yyyy)  

|  |  |
|--|--|
|  |  |
|--|--|

 : 

|  |  |
|--|--|
|  |  |
|--|--|

 (24hr clock)

**c. Dose:**

|  |  |  |  |  |
|--|--|--|--|--|
|  |  |  |  |  |
|--|--|--|--|--|

 . 

|  |  |
|--|--|
|  |  |
|--|--|

 mg  gram  mcg  
 Other : \_\_\_\_\_

**d. Freq:**

|  |  |
|--|--|
|  |  |
|--|--|

 . 

|  |  |
|--|--|
|  |  |
|--|--|

 hr

**e. Route:**  PO  IM  IV  SQ  PR  
 Other : \_\_\_\_\_

**f. Concentration:**

|  |  |
|--|--|
|  |  |
|--|--|

 . 

|  |  |
|--|--|
|  |  |
|--|--|

 mcg/mL  
 Other : \_\_\_\_\_

**Date :**

|  |  |
|--|--|
|  |  |
|--|--|

 / 

|  |  |
|--|--|
|  |  |
|--|--|

 / 

|  |  |  |  |
|--|--|--|--|
|  |  |  |  |
|--|--|--|--|

 (mm/dd/yyyy)

**Time :**

|  |  |
|--|--|
|  |  |
|--|--|

 : 

|  |  |
|--|--|
|  |  |
|--|--|

 (24hr clock)

**g. Trough Conc:**  Yes  No  Unknown

DR1 - CRF 10

Patient ID:

|  |  |  |  |  |  |
|--|--|--|--|--|--|
|  |  |  |  |  |  |
|--|--|--|--|--|--|

Coordinator ID:

|  |  |  |  |  |  |
|--|--|--|--|--|--|
|  |  |  |  |  |  |
|--|--|--|--|--|--|

Form ID:

|  |  |  |  |  |  |   |  |  |  |  |  |  |
|--|--|--|--|--|--|---|--|--|--|--|--|--|
|  |  |  |  |  |  | - |  |  |  |  |  |  |
|--|--|--|--|--|--|---|--|--|--|--|--|--|

**1. Did patient complete full study?**
 Yes    No
**2. What was the last time point that was completed?**

- Day of DIRI  
 Peak SCr or Peak Severity of Injury  
 Drug Stop or Dose Reduction  
 Nadir SCr or Resolution of Event  
 Hospital Discharge or Last Clinical Visit

**Inpatient Hospital Discharge or Outpatient Last Clinic Visit Status**
**3. Discharge or Last Visit Date:**

|  |  |
|--|--|
|  |  |
|--|--|

 / 

|  |  |
|--|--|
|  |  |
|--|--|

 / 

|  |  |  |  |
|--|--|--|--|
|  |  |  |  |
|--|--|--|--|

 (mm/dd/yyyy)

**4. Alive?**    Yes    No

**5. Required dialysis?**    Yes    No

**6. Serum Creatinine:**

|  |  |  |  |
|--|--|--|--|
|  |  |  |  |
|--|--|--|--|

 . 

|  |  |
|--|--|
|  |  |
|--|--|

 mg/dL  
 (Recorded on day closest to discharge)    umol/L

**7. Creatinine Date:**

|  |  |
|--|--|
|  |  |
|--|--|

 / 

|  |  |
|--|--|
|  |  |
|--|--|

 / 

|  |  |  |  |
|--|--|--|--|
|  |  |  |  |
|--|--|--|--|

 (mm/dd/yyyy)
**Dialysis Status**
**8. Was patient ever on dialysis during this study period?**    Yes    No

If Yes, answer the following questions:

**a. First day of dialysis:**

|  |  |
|--|--|
|  |  |
|--|--|

 / 

|  |  |
|--|--|
|  |  |
|--|--|

 / 

|  |  |  |  |
|--|--|--|--|
|  |  |  |  |
|--|--|--|--|

 (mm/dd/yyyy)

**b. Last day of dialysis:**

|  |  |
|--|--|
|  |  |
|--|--|

 / 

|  |  |
|--|--|
|  |  |
|--|--|

 / 

|  |  |  |  |
|--|--|--|--|
|  |  |  |  |
|--|--|--|--|

 (mm/dd/yyyy)

**c. Type of dialysis:** (Check all that apply.)

 IHD    CVVH    CVVHD    CVVHDF    SLED    UF Only    PD



DR1 - CRF 11

Patient ID:







Coordinator ID:







Form ID:












1. Date: 
 / 
 / 



 (mm/dd/yyyy)

2. Which follow-up?

 Day 28    Day 90

3. Who supplied follow-up information?

 Patient    Surrogate    Medical Record

4. Is patient alive?

 Yes    No    Unknown

5. If patient is alive, is patient dialysis dependent?

 Yes    No    Unknown

If patient is not dialysis dependent, please enter patient data obtained from patient's recent outpatient medical record or from current physician:

6. Source of Data:

 Medical Record    Current Physician

7. BUN:



 . 
 mg/dL    NA

 mmol/L

8. Creatinine:



 . 
 mg/dL    NA

 umol/L

9. Date of Data Recorded:

 / 
 / 



 (mm/dd/yyyy)    NA

DR1 - CRF 12

1. Patient ID:

2. Coordinator ID:

Affix Kit ID bar code label in box

|            |
|------------|
| Lab Kit ID |
|------------|

Sample A - Serum Mark if not collected

3. Date Collected:

 /  /  (mm/dd/yyyy)

4. Time Collected:

 :  (24-hour clock)

5. Volume Collected:

 .  ml

6. Number of Aliquots:

7. Day Frozen:

 Day after Collection Date    Same as Collection Date

8. Time Frozen:

 :  (24-hour clock)Sample C - Whole Blood Mark if not collected

9. Date Collected:

 /  /  (mm/dd/yyyy)

10. Time Collected:

 :  (24-hour clock)

11. Volume Collected:

 .  ml

12. Number of Aliquots:

13. Day Frozen:

 Day after Collection Date    Same as Collection Date

14. Time Frozen:

 :  (24-hour clock)Sample E - Urine Mark if not collected

15. Date Collected:

 /  /  (mm/dd/yyyy)

16. Time Collected:

 :  (24-hour clock)

17. Volume Collected:

 ml

18. Number of Aliquots:

19. Day Frozen:

 Day after Collection Date    Same as Collection Date

20. Time Frozen:

 :  (24-hour clock)

**Genomics of Drug Induced Renal Injury (DIRI) : Clinical Data Review**

**Patient ID:**  

|  |  |  |  |  |  |
|--|--|--|--|--|--|
|  |  |  |  |  |  |
|--|--|--|--|--|--|

**Coordinator ID:**  

|  |  |  |  |  |  |
|--|--|--|--|--|--|
|  |  |  |  |  |  |
|--|--|--|--|--|--|

**Form ID:**  

|  |  |  |  |  |  |  |  |  |  |
|--|--|--|--|--|--|--|--|--|--|
|  |  |  |  |  |  |  |  |  |  |
|--|--|--|--|--|--|--|--|--|--|

 - 
 

|  |  |  |  |  |  |
|--|--|--|--|--|--|
|  |  |  |  |  |  |
|--|--|--|--|--|--|

DIRI - CRF 14

**Case Summary**

a. Patient Location:  Inpatient     Outpatient

e. DIRI Phenotype:  AKI     Glomerular Disorder

b. Gender:  Male     Female

f. Study drugs that met DIRI criteria:

c. Age: 

|  |  |
|--|--|
|  |  |
|--|--|

i. 

|  |
|--|
|  |
|--|

d. Race: 

|  |
|--|
|  |
|--|

ii. 

|  |
|--|
|  |
|--|

iii. 

|  |
|--|
|  |
|--|

**Case Review**

1. Date of Review: 

|  |  |
|--|--|
|  |  |
|--|--|

 / 

|  |  |
|--|--|
|  |  |
|--|--|

 / 

|  |  |  |  |  |  |
|--|--|--|--|--|--|
|  |  |  |  |  |  |
|--|--|--|--|--|--|

 (mm/dd/yyyy)

2. Does the patient case have sufficient clinical data for adjudication?

Yes ----> If Yes, please assign adjudicators for this case and accept the patient into official adjudication process.

No ----> If No, please document all action items required for site coordinator to resolve the issues.

**Adjudicator Assignment**

3. Adjudicator 1: 

|  |  |  |  |  |  |  |  |  |  |  |  |  |  |  |  |  |  |  |  |
|--|--|--|--|--|--|--|--|--|--|--|--|--|--|--|--|--|--|--|--|
|  |  |  |  |  |  |  |  |  |  |  |  |  |  |  |  |  |  |  |  |
|--|--|--|--|--|--|--|--|--|--|--|--|--|--|--|--|--|--|--|--|

4. Adjudicator 2: 

|  |  |  |  |  |  |  |  |  |  |  |  |  |  |  |  |  |  |  |  |
|--|--|--|--|--|--|--|--|--|--|--|--|--|--|--|--|--|--|--|--|
|  |  |  |  |  |  |  |  |  |  |  |  |  |  |  |  |  |  |  |  |
|--|--|--|--|--|--|--|--|--|--|--|--|--|--|--|--|--|--|--|--|

5. Adjudicator 3: 

|  |  |  |  |  |  |  |  |  |  |  |  |  |  |  |  |  |  |  |  |
|--|--|--|--|--|--|--|--|--|--|--|--|--|--|--|--|--|--|--|--|
|  |  |  |  |  |  |  |  |  |  |  |  |  |  |  |  |  |  |  |  |
|--|--|--|--|--|--|--|--|--|--|--|--|--|--|--|--|--|--|--|--|

**Action Items**

6. Action Item 1:  Request for resolution     Submit for review     **Resolved**

a. 

|          |
|----------|
| [Review] |
|----------|

b. 

|            |
|------------|
| [Response] |
|------------|

7. Action Item 2:  Request for resolution     Submit for review     **Resolved**

a. 

|          |
|----------|
| [Review] |
|----------|

b. 

|            |
|------------|
| [Response] |
|------------|

8. Action Item 3:  Request for resolution     Submit for review     **Resolved**

a. 

|          |
|----------|
| [Review] |
|----------|

b. 

|            |
|------------|
| [Response] |
|------------|

Patient ID:

|  |  |  |  |  |  |
|--|--|--|--|--|--|
|  |  |  |  |  |  |
|--|--|--|--|--|--|

Form ID:

|  |  |  |  |  |  |   |  |  |  |  |  |
|--|--|--|--|--|--|---|--|--|--|--|--|
|  |  |  |  |  |  | - |  |  |  |  |  |
|--|--|--|--|--|--|---|--|--|--|--|--|

DIRI - CRF 14

9. Action Item 4:     Request for resolution     Submit for review     Resolved

a. [Review]

b. [Response]

10. Action Item 5:     Request for resolution     Submit for review     Resolved

a. [Review]

b. [Response]

11. Action Item 6:     Request for resolution     Submit for review     Resolved

a. [Review]

b. [Response]

12. Action Item 7:     Request for resolution     Submit for review     Resolved

a. [Review]

b. [Response]

13. Action Item 8:     Request for resolution     Submit for review     Resolved

a. [Review]

b. [Response]

Patient ID:

|  |  |  |  |  |  |
|--|--|--|--|--|--|
|  |  |  |  |  |  |
|--|--|--|--|--|--|

Form ID:

|  |  |  |  |  |  |   |  |  |  |  |  |
|--|--|--|--|--|--|---|--|--|--|--|--|
|  |  |  |  |  |  | - |  |  |  |  |  |
|--|--|--|--|--|--|---|--|--|--|--|--|

DR1 - CRF 14

14. Action Item 9:     Request for resolution     Submit for review     Resolved

a. [Review]

b. [Response]

15. Action Item 10:     Request for resolution     Submit for review     Resolved

a. [Review]

b. [Response]

Patient ID:

Grid for Patient ID

Form ID:

Grid for Form ID

DIRI - CRF 15

1. Adjudicator ID: [Grid]

2. Date of Review: [Grid] / [Grid] / [Grid] (mm/dd/yyyy)

3. a. Phenotype and DIRI criteria that was used to determine patient's eligibility for enrollment with this study:

- AKI phenotype with AKIN stage 2 criteria based on rising serum creatinine (based on time course and magnitude of creatinine change)
○ AKI phenotype with AKIN stage 2 criteria based on declining serum creatinine (based on time course and magnitude of creatinine change)
○ Glomerular disorder phenotype (based on biopsy)

b. Study Drugs:

Table with 5 columns: NA, Drug ID, Drug Name, Met DIRI Criteria. Rows for Drug 1, Drug 2, Drug 3.

4. Assessment Tools

a. Naranjo Scores (Naranjo CA, Busto U, Sellers EM, et al. A method for estimating the probability of adverse drug reactions. Clin. Pharmacol. Ther. 1981;30:239-245.)

Naranjo scores of 9 - 10 indicate that event was "definitely" an ADR; scores of 5 - 8 rate the likelihood as "probable"; scores of 1 - 4 are "possible"; and scores of less than 1 are "doubtful".

Table with 7 columns: Question, Question Points (Yes, No, DoNot Know), Subscores (Drug 1, Drug 2, Drug 3). 10 assessment questions and a summary row.

**Patient ID:**  

|  |  |  |  |  |  |
|--|--|--|--|--|--|
|  |  |  |  |  |  |
|--|--|--|--|--|--|

**Form ID:**  

|  |  |  |  |  |  |
|--|--|--|--|--|--|
|  |  |  |  |  |  |
|--|--|--|--|--|--|

 - 

|  |  |  |  |  |  |
|--|--|--|--|--|--|
|  |  |  |  |  |  |
|--|--|--|--|--|--|

DR1 - CRF 15

**4. Assessment Tools** (--- continued from Page 1 ---)

**b. Liverpool Adverse Drug Reaction Causality Assessment Tool** (DOI: 10.1371/journal.pone.0028096)

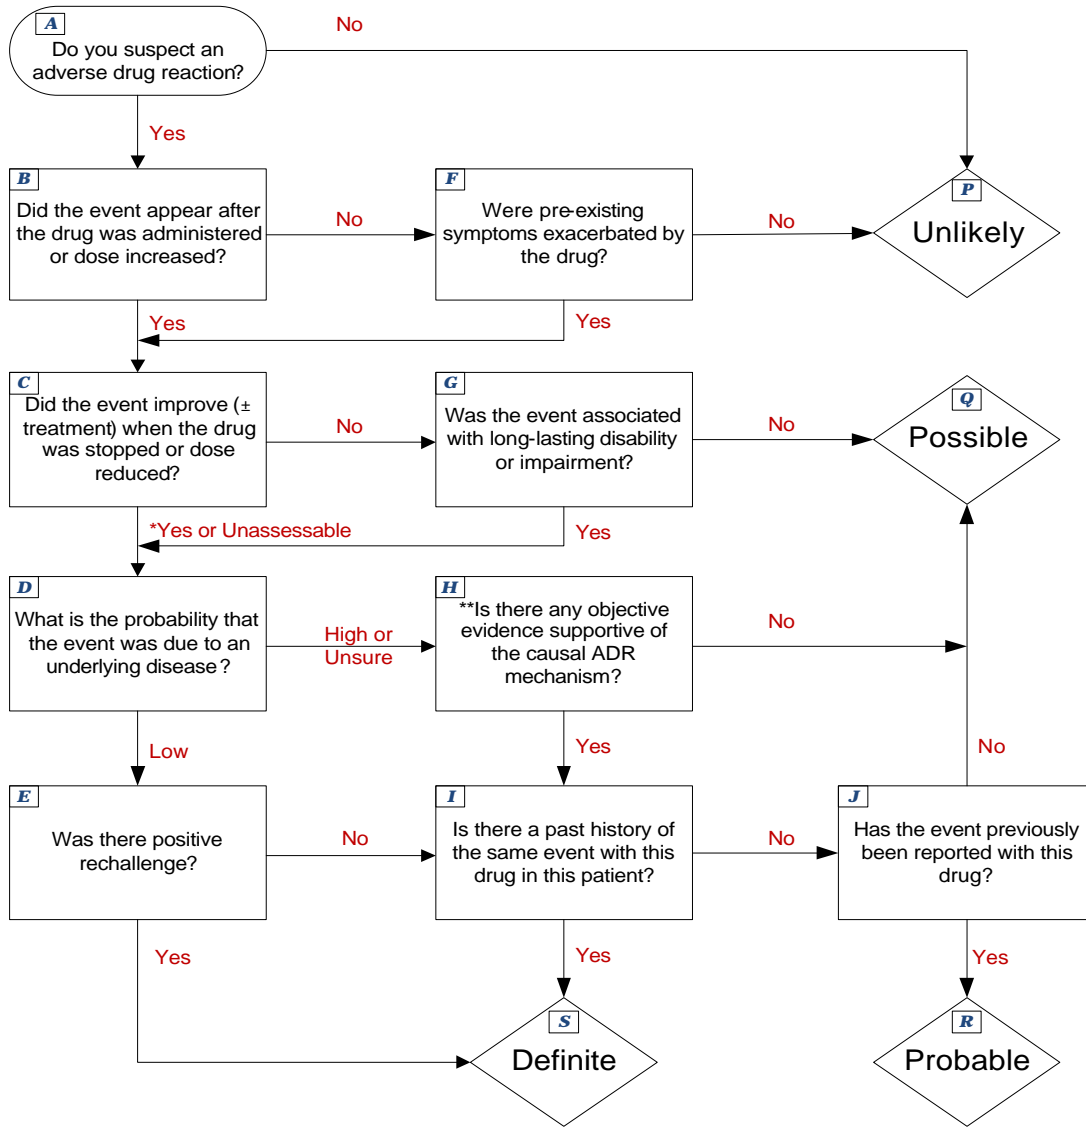

Apply the Liverpool ADR assessment tool to construct the decision paths and determine the likelihood of ADR associated with the drugs. Decision path is a sequence of tag letters (at the upper left corner of each question box) which represents an unbroken chain of path from box A to one of the final assessment results.

|               | Decision Path                                                                                                                                                                                                                                                                                                                                                                                                                                                                                                                                                                                                                                                | Result |  |  |  |  |  |  |  |  |  |  |  |                                                                                                                             |
|---------------|--------------------------------------------------------------------------------------------------------------------------------------------------------------------------------------------------------------------------------------------------------------------------------------------------------------------------------------------------------------------------------------------------------------------------------------------------------------------------------------------------------------------------------------------------------------------------------------------------------------------------------------------------------------|--------|--|--|--|--|--|--|--|--|--|--|--|-----------------------------------------------------------------------------------------------------------------------------|
| <b>Drug 1</b> | <table border="1" style="display: inline-table; border-collapse: collapse;"> <tr> <td style="width: 20px; height: 20px;"></td> </tr> </table> |        |  |  |  |  |  |  |  |  |  |  |  | <input type="radio"/> Unlikely <input type="radio"/> Possible <input type="radio"/> Probable <input type="radio"/> Definite |
|               |                                                                                                                                                                                                                                                                                                                                                                                                                                                                                                                                                                                                                                                              |        |  |  |  |  |  |  |  |  |  |  |  |                                                                                                                             |
| <b>Drug 2</b> | <table border="1" style="display: inline-table; border-collapse: collapse;"> <tr> <td style="width: 20px; height: 20px;"></td> </tr> </table> |        |  |  |  |  |  |  |  |  |  |  |  | <input type="radio"/> Unlikely <input type="radio"/> Possible <input type="radio"/> Probable <input type="radio"/> Definite |
|               |                                                                                                                                                                                                                                                                                                                                                                                                                                                                                                                                                                                                                                                              |        |  |  |  |  |  |  |  |  |  |  |  |                                                                                                                             |
| <b>Drug 3</b> | <table border="1" style="display: inline-table; border-collapse: collapse;"> <tr> <td style="width: 20px; height: 20px;"></td> </tr> </table> |        |  |  |  |  |  |  |  |  |  |  |  | <input type="radio"/> Unlikely <input type="radio"/> Possible <input type="radio"/> Probable <input type="radio"/> Definite |
|               |                                                                                                                                                                                                                                                                                                                                                                                                                                                                                                                                                                                                                                                              |        |  |  |  |  |  |  |  |  |  |  |  |                                                                                                                             |

**Patient ID:**  

|  |  |  |  |  |  |
|--|--|--|--|--|--|
|  |  |  |  |  |  |
|--|--|--|--|--|--|

**Form ID:**  

|  |  |  |  |  |  |
|--|--|--|--|--|--|
|  |  |  |  |  |  |
|--|--|--|--|--|--|

 - 

|  |  |  |  |  |  |
|--|--|--|--|--|--|
|  |  |  |  |  |  |
|--|--|--|--|--|--|

DR1 - CRF 15

**5. Event attributable to drug and if so what level of certainty (use Naranjo scores and Liverpool assessment tool in #4):**

| Assessment                                                                                                                                                                                                                                                                               | Drug 1                                                                                                                               | Drug 2                                                                                                                               | Drug 3                                                                                                                               | Underlying and Concomitant Risk Factors                                                                                                                                                                                             |  |  |  |                                                                                                                                                                                                                                     |  |  |  |                                                                                                                                                                                                                                     |  |  |  |                                                                                                                                                                                                                                     |  |  |  |
|------------------------------------------------------------------------------------------------------------------------------------------------------------------------------------------------------------------------------------------------------------------------------------------|--------------------------------------------------------------------------------------------------------------------------------------|--------------------------------------------------------------------------------------------------------------------------------------|--------------------------------------------------------------------------------------------------------------------------------------|-------------------------------------------------------------------------------------------------------------------------------------------------------------------------------------------------------------------------------------|--|--|--|-------------------------------------------------------------------------------------------------------------------------------------------------------------------------------------------------------------------------------------|--|--|--|-------------------------------------------------------------------------------------------------------------------------------------------------------------------------------------------------------------------------------------|--|--|--|-------------------------------------------------------------------------------------------------------------------------------------------------------------------------------------------------------------------------------------|--|--|--|
| <b>Likely Cause to ADR</b>                                                                                                                                                                                                                                                               | <input type="radio"/> Unlikely<br><input type="radio"/> Possible<br><input type="radio"/> Probable<br><input type="radio"/> Definite | <input type="radio"/> Unlikely<br><input type="radio"/> Possible<br><input type="radio"/> Probable<br><input type="radio"/> Definite | <input type="radio"/> Unlikely<br><input type="radio"/> Possible<br><input type="radio"/> Probable<br><input type="radio"/> Definite | <input type="radio"/> Unlikely<br><input type="radio"/> Possible<br><input type="radio"/> Probable<br><input type="radio"/> Definite                                                                                                |  |  |  |                                                                                                                                                                                                                                     |  |  |  |                                                                                                                                                                                                                                     |  |  |  |                                                                                                                                                                                                                                     |  |  |  |
| <b>Percent Contribution</b> (add to 100%)<br>Total = <table border="1" style="display: inline-table; border-collapse: collapse;"><tr><td style="width: 20px; height: 20px;"></td><td style="width: 20px; height: 20px;"></td><td style="width: 20px; height: 20px;"></td></tr></table> % |                                                                                                                                      |                                                                                                                                      |                                                                                                                                      | <table border="1" style="display: inline-table; border-collapse: collapse;"><tr><td style="width: 20px; height: 20px;"></td><td style="width: 20px; height: 20px;"></td><td style="width: 20px; height: 20px;"></td></tr></table> % |  |  |  | <table border="1" style="display: inline-table; border-collapse: collapse;"><tr><td style="width: 20px; height: 20px;"></td><td style="width: 20px; height: 20px;"></td><td style="width: 20px; height: 20px;"></td></tr></table> % |  |  |  | <table border="1" style="display: inline-table; border-collapse: collapse;"><tr><td style="width: 20px; height: 20px;"></td><td style="width: 20px; height: 20px;"></td><td style="width: 20px; height: 20px;"></td></tr></table> % |  |  |  | <table border="1" style="display: inline-table; border-collapse: collapse;"><tr><td style="width: 20px; height: 20px;"></td><td style="width: 20px; height: 20px;"></td><td style="width: 20px; height: 20px;"></td></tr></table> % |  |  |  |
|                                                                                                                                                                                                                                                                                          |                                                                                                                                      |                                                                                                                                      |                                                                                                                                      |                                                                                                                                                                                                                                     |  |  |  |                                                                                                                                                                                                                                     |  |  |  |                                                                                                                                                                                                                                     |  |  |  |                                                                                                                                                                                                                                     |  |  |  |
|                                                                                                                                                                                                                                                                                          |                                                                                                                                      |                                                                                                                                      |                                                                                                                                      |                                                                                                                                                                                                                                     |  |  |  |                                                                                                                                                                                                                                     |  |  |  |                                                                                                                                                                                                                                     |  |  |  |                                                                                                                                                                                                                                     |  |  |  |
|                                                                                                                                                                                                                                                                                          |                                                                                                                                      |                                                                                                                                      |                                                                                                                                      |                                                                                                                                                                                                                                     |  |  |  |                                                                                                                                                                                                                                     |  |  |  |                                                                                                                                                                                                                                     |  |  |  |                                                                                                                                                                                                                                     |  |  |  |
|                                                                                                                                                                                                                                                                                          |                                                                                                                                      |                                                                                                                                      |                                                                                                                                      |                                                                                                                                                                                                                                     |  |  |  |                                                                                                                                                                                                                                     |  |  |  |                                                                                                                                                                                                                                     |  |  |  |                                                                                                                                                                                                                                     |  |  |  |
|                                                                                                                                                                                                                                                                                          |                                                                                                                                      |                                                                                                                                      |                                                                                                                                      |                                                                                                                                                                                                                                     |  |  |  |                                                                                                                                                                                                                                     |  |  |  |                                                                                                                                                                                                                                     |  |  |  |                                                                                                                                                                                                                                     |  |  |  |
| <b>Type of Event</b><br>A: Drug Toxicity<br>B: Hypersensitivity                                                                                                                                                                                                                          | <input type="radio"/> Drug Toxicity<br><input type="radio"/> Hypersensitivity                                                        | <input type="radio"/> Drug Toxicity<br><input type="radio"/> Hypersensitivity                                                        | <input type="radio"/> Drug Toxicity<br><input type="radio"/> Hypersensitivity                                                        |                                                                                                                                                                                                                                     |  |  |  |                                                                                                                                                                                                                                     |  |  |  |                                                                                                                                                                                                                                     |  |  |  |                                                                                                                                                                                                                                     |  |  |  |

**6. Relative contribution of various categories of risk factors (reported in CRF05) in relation to drug exposure:**

| Risk Factors                                                                                                                                              | Percent contribution of individual risk factor category to overall risk (total among risk factors should be 100%)                                                                                                                   |  |  |  |
|-----------------------------------------------------------------------------------------------------------------------------------------------------------|-------------------------------------------------------------------------------------------------------------------------------------------------------------------------------------------------------------------------------------|--|--|--|
| a. Procedures requiring intravascular contrast agents                                                                                                     | <table border="1" style="display: inline-table; border-collapse: collapse;"><tr><td style="width: 20px; height: 20px;"></td><td style="width: 20px; height: 20px;"></td><td style="width: 20px; height: 20px;"></td></tr></table> % |  |  |  |
|                                                                                                                                                           |                                                                                                                                                                                                                                     |  |  |  |
| b. Nephrotoxic agents                                                                                                                                     | <table border="1" style="display: inline-table; border-collapse: collapse;"><tr><td style="width: 20px; height: 20px;"></td><td style="width: 20px; height: 20px;"></td><td style="width: 20px; height: 20px;"></td></tr></table> % |  |  |  |
|                                                                                                                                                           |                                                                                                                                                                                                                                     |  |  |  |
| c. Surgical procedures requiring general anesthesia                                                                                                       | <table border="1" style="display: inline-table; border-collapse: collapse;"><tr><td style="width: 20px; height: 20px;"></td><td style="width: 20px; height: 20px;"></td><td style="width: 20px; height: 20px;"></td></tr></table> % |  |  |  |
|                                                                                                                                                           |                                                                                                                                                                                                                                     |  |  |  |
| d. MAP < 65 mmHg for more than 60 minutes if monitored, or SBP < 90 mmHg if not monitored                                                                 | <table border="1" style="display: inline-table; border-collapse: collapse;"><tr><td style="width: 20px; height: 20px;"></td><td style="width: 20px; height: 20px;"></td><td style="width: 20px; height: 20px;"></td></tr></table> % |  |  |  |
|                                                                                                                                                           |                                                                                                                                                                                                                                     |  |  |  |
| e. Additional risk factors for AKI (intravascular fluid loss, increased vascular capacity, cardiac failure, liver diseases, ECF losses, other procedures) | <table border="1" style="display: inline-table; border-collapse: collapse;"><tr><td style="width: 20px; height: 20px;"></td><td style="width: 20px; height: 20px;"></td><td style="width: 20px; height: 20px;"></td></tr></table> % |  |  |  |
|                                                                                                                                                           |                                                                                                                                                                                                                                     |  |  |  |
| f. RBC transfusion                                                                                                                                        | <table border="1" style="display: inline-table; border-collapse: collapse;"><tr><td style="width: 20px; height: 20px;"></td><td style="width: 20px; height: 20px;"></td><td style="width: 20px; height: 20px;"></td></tr></table> % |  |  |  |
|                                                                                                                                                           |                                                                                                                                                                                                                                     |  |  |  |
| g. Hyperglycemia                                                                                                                                          | <table border="1" style="display: inline-table; border-collapse: collapse;"><tr><td style="width: 20px; height: 20px;"></td><td style="width: 20px; height: 20px;"></td><td style="width: 20px; height: 20px;"></td></tr></table> % |  |  |  |
|                                                                                                                                                           |                                                                                                                                                                                                                                     |  |  |  |
| <b>Total =</b>                                                                                                                                            | <table border="1" style="display: inline-table; border-collapse: collapse;"><tr><td style="width: 20px; height: 20px;"></td><td style="width: 20px; height: 20px;"></td><td style="width: 20px; height: 20px;"></td></tr></table> % |  |  |  |
|                                                                                                                                                           |                                                                                                                                                                                                                                     |  |  |  |



DR1 - CRF 15

**Patient ID:**  

|  |  |  |  |  |  |  |  |
|--|--|--|--|--|--|--|--|
|  |  |  |  |  |  |  |  |
|--|--|--|--|--|--|--|--|

**Form ID:**  

|  |  |  |  |  |  |  |  |
|--|--|--|--|--|--|--|--|
|  |  |  |  |  |  |  |  |
|--|--|--|--|--|--|--|--|

 - 

|  |  |  |  |  |  |  |  |
|--|--|--|--|--|--|--|--|
|  |  |  |  |  |  |  |  |
|--|--|--|--|--|--|--|--|

**Adjudication Result:**

7. DIRI confirmed?     Yes     No     Need More Information

If No, why?

|  |
|--|
|  |
|--|

If Need More Information, please list below:

|  |
|--|
|  |
|--|
